# Supplementary material for: Artificial intelligence to improve back pain outcomes and lessons learnt from clinical classification approaches: three systematic reviews
Source: PubMed Central journal article supplement (PMC7347608; doi:10.1038/s41746-020-0303-x), 2020-07-09
Supplement: 41746_2020_303_MOESM1_ESM.pdf [file 41746_2020_303_MOESM1_ESM.pdf]

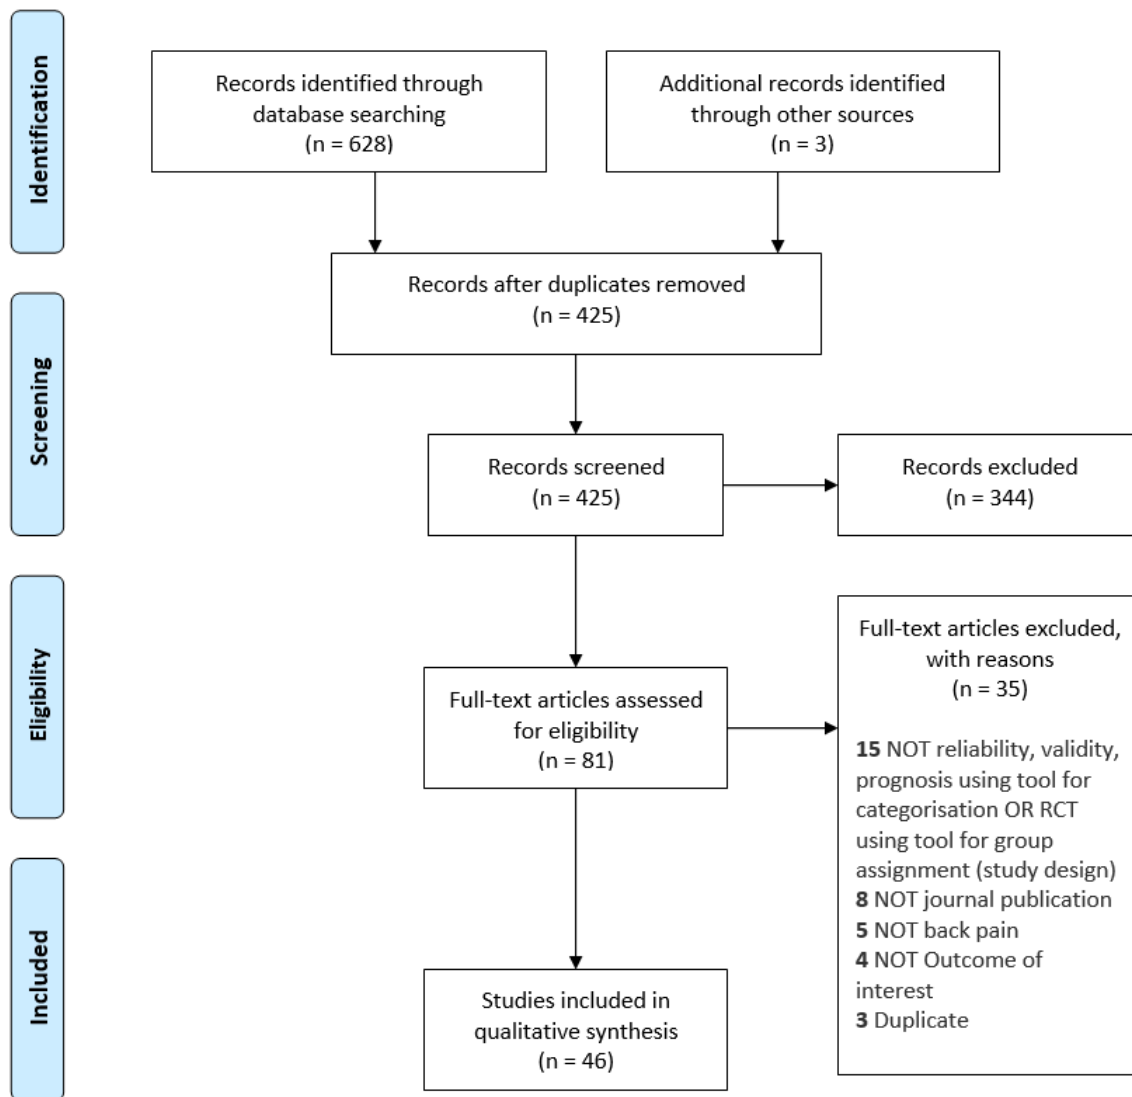

Supplementary Figure 1. PRISMA diagram for STarT Back review

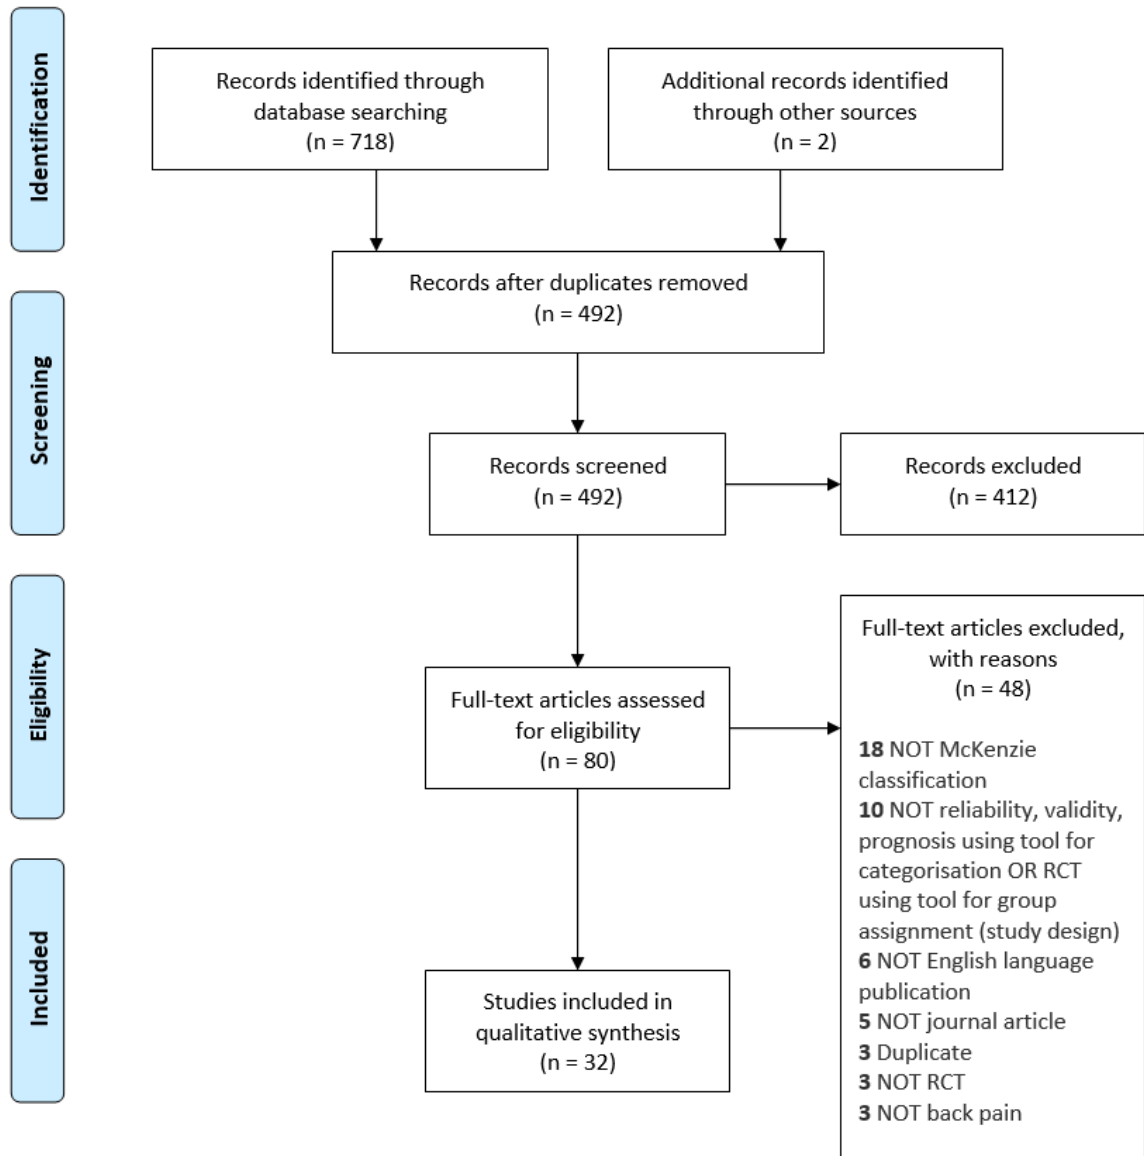

Supplementary Figure 2. PRISMA diagram for McKenzie review.

**Supplementary Table 1.** Reasons for exclusion at full-text screening for AI/ML studies.

| <b>Authors</b>                                                                                                                                                                | <b>Year</b> | <b>Title</b>                                                                                                                         | <b>Exclusion Reason</b>                                                                                                   |
|-------------------------------------------------------------------------------------------------------------------------------------------------------------------------------|-------------|--------------------------------------------------------------------------------------------------------------------------------------|---------------------------------------------------------------------------------------------------------------------------|
| Vaughn, ML; Cavill, SJ; Taylor, SJ; Foy, MA; Fogg, AJB                                                                                                                        | 1999        | Using direct explanations to validate a multi-layer perceptron network that classifies low back pain patients                        | Exclusion reason: Duplicate sample.                                                                                       |
| Siddall, Philip J; Stanwell, Peter; Woodhouse, Annie; Somorjai, Ray L; Dolenko, Brion; Nikulin, Alexander; Bourne, Roger; Himmelreich, Uwe; Lean, Cynthia; Cousins, Michael J | 2006        | Magnetic resonance spectroscopy detects biochemical changes in the brain associated with chronic low back pain: a preliminary report | Exclusion reason: NOT artificial intelligence / machine learning techniques.                                              |
| Bounds; Lloyd; Mathew; Waddell                                                                                                                                                | 1988        | A multilayer perceptron network for the diagnosis of low back pain                                                                   | Exclusion reason: Duplicate sample.                                                                                       |
| N. Wang; Z. Zhang; J. Xiao; L. Cui                                                                                                                                            | 2019        | DeepLap: A Deep Learning based Non-Specific Low Back Pain Symptomatic Muscles Recognition System                                     | Exclusion reason: NO outcome of interest.                                                                                 |
| N. Wang; J. Xiao; L. Cui                                                                                                                                                      | 2018        | EasiSMR: Recognizing Non-Specific Low Back Pain Symptomatic Muscles Using Multi-Muscles Fusion based Machine Learning                | Exclusion reason: NO outcome of interest.                                                                                 |
| M. L. Vaughn; S. J. Taylor; M. A. Foy; A. J. B. Fogg                                                                                                                          | 2001        | Investigating the reliability of a low-back-pain MLP by using a full explanation facility                                            | Exclusion reason: Duplicate sample.                                                                                       |
| M. L. Vaughn; S. J. Cavill; S. J. Taylor; M. A. Foy; A. J. B. Fogg                                                                                                            | 1998        | Interpretation and knowledge discovery from a MLP network that performs low back pain classification                                 | Exclusion reason: NO outcome of interest.                                                                                 |
| M. Capecchi; L. Ciabattini; F. Ferracuti; A. Monerri; L. Romeo; F. Verdini                                                                                                    | 2018        | Collaborative design of a telerehabilitation system enabling virtual second opinion based on fuzzy logic                             | Exclusion reason: NO outcome of interest.                                                                                 |
| M. Bhatt; V. Dahiya; A. Singh                                                                                                                                                 | 2019        | Supervised Learning Algorithm: SVM with Advanced Kernel to classify Lower Back Pain                                                  | Exclusion reason: NO outcome of interest.                                                                                 |
| Sani, Sadiq; Wiratunga, Nirmalie; Massie, Stewart; Cooper, Kay                                                                                                                | 2016        | SELFBACK activity recognition for self-management of low back pain                                                                   | Exclusion reason: NOT back pain (e.g. image or signal processing excluded when not used for classification of back pain). |
| Biurrun Manresa, JosÃ© A; Nguyen, Giang P; Curatolo, Michele; Moeslund, Thomas B; Andersen, Ole K                                                                             | 2013        | Probabilistic model for individual assessment of central hyperexcitability using the nociceptive withdrawal reflex: a                | Exclusion reason: NOT back pain (e.g. image or signal processing excluded when not used for classification of back pain). |

|                                                                                                                                              |      |                                                                                                                                                |                                                                                                                           |
|----------------------------------------------------------------------------------------------------------------------------------------------|------|------------------------------------------------------------------------------------------------------------------------------------------------|---------------------------------------------------------------------------------------------------------------------------|
|                                                                                                                                              |      | biomarker for chronic low back and neck pain.                                                                                                  |                                                                                                                           |
| Benditz, Achim; Faber, Florian; Wenk, Gabriela; Fuchs, Tina; Salak, Natalie; Grifka, Joachim; Vogl, Matthias; Menke, Matthias; Jansen, Petra | 2019 | The Role of a Decision Support System in Back Pain Diagnoses: A Pilot Study                                                                    | Exclusion reason: NOT artificial intelligence / machine learning techniques.                                              |
| Boissoneault, Jeff; Sevel, Landrew; Letzen, Janelle; Robinson, Michael; Staud, Roland                                                        | 2017 | Biomarkers for Musculoskeletal Pain Conditions: Use of Brain Imaging and Machine Learning                                                      | Exclusion reason: NOT original research (reviews excluded).                                                               |
| Faruqui, Syed Hasib Akhter; Alaeddini, Adel; Jaramillo, Carlos A.; Potter, Jennifer S.; Pugh, Mary Jo                                        | 2018 | Mining patterns of comorbidity evolution in patients with multiple chronic conditions using unsupervised multi-level temporal Bayesian network | Exclusion reason: NOT back pain (e.g. image or signal processing excluded when not used for classification of back pain). |
| Apalit, Nathan                                                                                                                               | 2010 | The Work Ratio--modeling the likelihood of return to work for workers with musculoskeletal disorders: A fuzzy logic approach                   | Exclusion reason: NOT back pain (e.g. image or signal processing excluded when not used for classification of back pain). |
| Bishop JB                                                                                                                                    | 1999 | Feature extraction and analysis of dynamic motion of the lumbar spine.                                                                         | Exclusion reason: NOT peer-reviewed journal.                                                                              |

**Supplementary Table 2.** Reasons for exclusion at full-text screening for STarT Back studies.

| <b>Authors</b>                                                                                                                                                                                                     | <b>Year</b> | <b>Title</b>                                                                                                                                                                               | <b>Exclusion Reason</b>                                                                                                                                |
|--------------------------------------------------------------------------------------------------------------------------------------------------------------------------------------------------------------------|-------------|--------------------------------------------------------------------------------------------------------------------------------------------------------------------------------------------|--------------------------------------------------------------------------------------------------------------------------------------------------------|
| Hestbaek, Lise; Munck, Anders; Hartvigsen, Lisbeth; Jarb ,l, Dorte Ejg; S ,ndergaard, Jens; Kongsted, Alice                                                                                                        | 2014        | Low back pain in primary care: a description of 1250 patients with low back pain in danish general and chiropractic practice                                                               | Exclusion reason: NOT reliability, validity, prognosis using tool for categorisation or clinical trial using tool for group assignment (study design). |
| Kongsted, Alice; Johannesen, Else; Leboeuf-Yde, Charlotte                                                                                                                                                          | 2011        | Feasibility of the STarT Back Screening Tool in chiropractic clinics: A cross-sectional study of patients with low back pain                                                               | Exclusion reason: NOT Outcome of interest.                                                                                                             |
| Bamford, Adrian; Nation, Andy; Durrell, Susie; Andronis, Lazaros; Rule, Ellen; McLeod, Hugh                                                                                                                        | 2017        | Implementing the Keele stratified care model for patients with low back pain: an observational impact study                                                                                | Exclusion reason: NOT Outcome of interest.                                                                                                             |
| Medeiros, F. C.; Costa, L. O. P.; Oliveira, I. S.; Costa, Ldem                                                                                                                                                     | 2019        | A Responsiveness Analysis of the Subgroups for Targeted Treatment (STarT) Back Screening Tool in Patients With Nonspecific Low Back Pain                                                   | Exclusion reason: NOT reliability, validity, prognosis using tool for categorisation or clinical trial using tool for group assignment (study design). |
| Werneke Mw Pt, M. S. Dip M. D. T.; Edmond S Pt, DSc O. C. S.; Young M Pt, Cred M. D. T.; Grigsby D Pt, Cert M. D. T.; McClenahan B Pt, M. S. O. C. S. Dip M. D. T. Faaompt; McGill T Pt, PhD S. C. S. Dip M. D. T. | 2018        | Association between changes in function among patients with lumbar impairments classified according to the STarT Back Screening Tool and managed by McKenzie credentialed physiotherapists | Exclusion reason: NOT Outcome of interest.                                                                                                             |
| Newell, D.; Field, J.; Pollard, D.                                                                                                                                                                                 | 2015        | Using the STarT Back Tool: does timing of stratification matter?                                                                                                                           | Exclusion reason: NOT Outcome of interest.                                                                                                             |
| Bier, J. D.; Sandee-Geurts, J. J. W.; Ostelo, Rwjg; Koes, B. W.; Verhagen, A. P.                                                                                                                                   | 2018        | Can Primary Care for Back and/or Neck Pain in the Netherlands Benefit From Stratification for Risk Groups According to the STarT Back Tool Classification?                                 | Exclusion reason: NOT back pain.                                                                                                                       |
| Morso, Lars; Kongsted, Alice; Hestbaek, Lise; Kent, Peter                                                                                                                                                          | 2016        | The prognostic ability of the STarT Back Tool was affected by episode duration                                                                                                             | Exclusion reason: NOT reliability, validity, prognosis using tool for categorisation or clinical trial using tool for group assignment (study design). |
| Wideman, T. H.; Hill, J. C.; Main, C. J.; Lewis, M.; Sullivan, M. J.; Hay, E. M.                                                                                                                                   | 2012        | Comparing the responsiveness of a brief, multidimensional risk screening tool for back pain to its unidimensional reference standards:                                                     | Exclusion reason: NOT reliability, validity, prognosis using tool for categorisation or                                                                |

|                                                                                                                                                          |      |                                                                                                                                                             |                                                                                                                                                        |
|----------------------------------------------------------------------------------------------------------------------------------------------------------|------|-------------------------------------------------------------------------------------------------------------------------------------------------------------|--------------------------------------------------------------------------------------------------------------------------------------------------------|
|                                                                                                                                                          |      | the whole is greater than the sum of its parts                                                                                                              | clinical trial using tool for group assignment (study design).                                                                                         |
| Wertli, Maria M.; Held, Ulrike; Lis, Angela; Campello, Marco; Weiser, Sherri                                                                             | 2018 | Both positive and negative beliefs are important in patients with spine pain: findings from the Occupational and Industrial Orthopaedic Center registry     | Exclusion reason: NOT reliability, validity, prognosis using tool for categorisation or clinical trial using tool for group assignment (study design). |
| Riis, A.; Jensen, C. E.; Bro, F.; Maindal, H. T.; Petersen, K. D.; Bendtsen, M. D.; Jensen, M. B.                                                        | 2016 | A multifaceted implementation strategy versus passive implementation of low back pain guidelines in general practice: a cluster randomised controlled trial | Exclusion reason: NOT reliability, validity, prognosis using tool for categorisation or clinical trial using tool for group assignment (study design). |
| Morso, L.; Albert, H.; Kent, P.; Manniche, C.; Hill, J.                                                                                                  | 2011 | Translation and discriminative validation of the STarT Back Screening Tool into Danish                                                                      | Exclusion reason: NOT reliability, validity, prognosis using tool for categorisation or clinical trial using tool for group assignment (study design). |
| Magel, J.; Fritz, J. M.; Greene, T.; Kjaer, P.; Marcus, R. L.; Brennan, G. P.                                                                            | 2017 | Outcomes of Patients With Acute Low Back Pain Stratified by the STarT Back Screening Tool: secondary Analysis of a Randomized Trial                         | Exclusion reason: NOT reliability, validity, prognosis using tool for categorisation or clinical trial using tool for group assignment (study design). |
| Kloek, C. J. J.; van Tilburg, M. L.; Staal, J. B.; Veenhof, C.; Bossen, D.                                                                               | 2019 | Development and proof of concept of a blended physiotherapeutic intervention for patients with non-specific low back pain                                   | Exclusion reason: NOT reliability, validity, prognosis using tool for categorisation or clinical trial using tool for group assignment (study design). |
| Fuhro, F. F.; Fagundes, F. R.; Manzonei, A. C.; Costa, L. O.; Cabral, C. M.                                                                              | 2016 | Orebro Musculoskeletal Pain Screening Questionnaire Short-Form and STarT Back Screening Tool: Correlation and Agreement Analysis                            | Exclusion reason: Duplicate.                                                                                                                           |
| Fritz, J. M.; Beneciuk, J. M.; George, S. Z.                                                                                                             | 2011 | Relationship between categorization with the STarT Back Screening Tool and prognosis for people receiving physical therapy for low back pain                | Exclusion reason: NOT reliability, validity, prognosis using tool for categorisation or clinical trial using tool for group assignment (study design). |
| Unsgaard-Tondel, M.; Kregnes, I. G.; Nilsen, T. I. L.; Marchand, G. H.; Askim, T.                                                                        | 2018 | Risk classification of patients referred to secondary care for low back pain                                                                                | Exclusion reason: NOT reliability, validity, prognosis using tool for categorisation or clinical trial using tool for group assignment (study design). |
| Rabey, Martin; Kendall, Michelle; Godden, Chris; Liburd, Jermaine; Netley, Hayley; O'Shaughnessy, Ciaran; O'Sullivan, Peter; Smith, Anne; Beales, Darren | 2019 | Start back tool risk stratification is associated with changes in movement profile and sensory discrimination in low back pain: A study of 290 patients     | Exclusion reason: NOT reliability, validity, prognosis using tool for categorisation or clinical trial using tool for group assignment (study design). |

|                                                                                                                                                        |      |                                                                                                                                                                                                        |                                                                                                                                                                    |
|--------------------------------------------------------------------------------------------------------------------------------------------------------|------|--------------------------------------------------------------------------------------------------------------------------------------------------------------------------------------------------------|--------------------------------------------------------------------------------------------------------------------------------------------------------------------|
| Nitsch, Kristian P.;<br>Davis, Katharine; Stipp,<br>Kelsey                                                                                             | 2016 | Psychometric Measurement<br>Properties and Clinical Utility of the<br>Keele STarT Back Screening Tool in<br>People With Low Back Pain                                                                  | Exclusion reason: NOT journal<br>publication.                                                                                                                      |
| Hill, J. C.; Afolabi, E.<br>K.; Lewis, M.; Dunn, K.<br>M.; Roddy, E.; van der<br>Windt, D. A.; Foster, N.<br>E.                                        | 2016 | Does a modified STarT Back Tool<br>predict outcome with a broader<br>group of musculoskeletal patients<br>than back pain? A secondary<br>analysis of cohort data                                       | Exclusion reason: NOT back<br>pain.                                                                                                                                |
| Forsbrand, M. H.;<br>Grahn, B.; Hill, J. C.;<br>Pettersson, I. F.; Post<br>Sennehed, C.; Stigmar,<br>K.                                                | 2018 | Can the STarT Back Tool predict<br>health-related quality of life and<br>work ability after an acute/subacute<br>episode with back or neck pain? A<br>psychometric validation study in<br>primary care | Exclusion reason: NOT back<br>pain.                                                                                                                                |
| Forsbrand, M.; Grahn,<br>B.; Hill, J. C.; Pettersson,<br>I. F.; Sennehed, C. P.;<br>Stigmar, K.                                                        | 2017 | Comparison of the Swedish STarT<br>Back Screening Tool and the Short<br>Form of the Orebro Musculoskeletal<br>Pain Screening Questionnaire in<br>patients with acute or subacute back<br>and neck pain | Exclusion reason: NOT back<br>pain.                                                                                                                                |
| Field, J. R.; Newell, D.                                                                                                                               | 2016 | Clinical Outcomes in a Large Cohort<br>of Musculoskeletal Patients<br>Undergoing Chiropractic Care in the<br>United Kingdom: A Comparison of<br>Self- and National Health Service-<br>Referred Routes  | Exclusion reason: NOT<br>reliability, validity, prognosis<br>using tool for categorisation or<br>clinical trial using tool for group<br>assignment (study design). |
| Beneciuk, J. M.;<br>Ballengee, L. A.;<br>George, S. Z.                                                                                                 | 2019 | Treatment monitoring as a<br>component of psychologically<br>informed physical therapy: A case<br>series of patients at high risk for<br>persistent low back pain related<br>disability                | Exclusion reason: NOT<br>reliability, validity, prognosis<br>using tool for categorisation or<br>clinical trial using tool for group<br>assignment (study design). |
| DalkilinÅ§, M.; Parlak<br>Demir, Y.; Å¶irak, Y.;<br>Yilmaz Yelvar, G. D.;<br>Nur KaradÅ¼z, B.;<br>UÇ§ur, R.; Kolsuz, M.;<br>Evren, M. B.; Akman,<br>M. | 2015 | Validity and reliability of Turkish<br>version of start back screening tool                                                                                                                            | Exclusion reason: NOT journal<br>publication.                                                                                                                      |
| Aili, K.; Bergman, S.;<br>Haglund, E.                                                                                                                  | 2019 | Adding information on widespread<br>pain to the start back screening tool<br>when identifying low back pain<br>patientsat increased risk for poor<br>prognosis                                         | Exclusion reason: NOT journal<br>publication.                                                                                                                      |
| Suri, P.; Delaney, K.;<br>Rundell, S. D.; Cherkin,<br>D. C.                                                                                            | 2018 | Predictive Validity of the STarT<br>Back Tool for Risk of Persistent<br>Disabling Back Pain in a U.S<br>Primary Care Setting                                                                           | Exclusion reason: Duplicate.                                                                                                                                       |

|                                                                                                                                          |      |                                                                                                                                                                                                          |                                                                                                                                                        |
|------------------------------------------------------------------------------------------------------------------------------------------|------|----------------------------------------------------------------------------------------------------------------------------------------------------------------------------------------------------------|--------------------------------------------------------------------------------------------------------------------------------------------------------|
| Storheim, Kjersti                                                                                                                        | 2012 | Targeted physiotherapy treatment for low back pain based on clinical risk can improve clinical and economic outcomes when compared with current best practice                                            | Exclusion reason: NOT reliability, validity, prognosis using tool for categorisation or clinical trial using tool for group assignment (study design). |
| Mason, E.; Hill, J. C.; Lewis, M.; Dunn, K. M.; Hay, E. M.                                                                               | 2011 | Does targeted treatment for low back pain improve patient satisfaction and better meet expectations compared to current best care?                                                                       | Exclusion reason: NOT journal publication.                                                                                                             |
| Forsbrand, M.; Grahn, B.; Hill, J. C.; Peterson,, II; Post Sennehed, C.; Stigmar, K.                                                     | 2015 | Validation of the swedish version of start back tool against the short version of the Årrebro musculoskeletal pain screening questionnaire in patients with back and/or neck pain in primary health care | Exclusion reason: NOT journal publication.                                                                                                             |
| Beneciuk, Jason Michael                                                                                                                  | 2014 | Investigation of the Start Back Screening Tool in outpatient physical therapy settings                                                                                                                   | Exclusion reason: NOT journal publication.                                                                                                             |
| Beneciuk, J.; George, S.                                                                                                                 | 2013 | Prediction and clinical outcome implications of sustained STarT back screening tool high-risk status following 4-weeks of physical therapy for low back pain                                             | Exclusion reason: NOT journal publication.                                                                                                             |
| Karstens, S.; Krug, K.; Hill, J. C.; Stock, C.; Steinhäuser, J.; Szecsenyi, J.; Joos, S.                                                 | 2015 | Validation of the German version of the STarT-Back Tool (STarT-G): A cohort study with patients from primary care practices Rehabilitation, physical therapy and occupational health                     | Exclusion reason: Duplicate.                                                                                                                           |
| Hill, J.; Dunn, K. M.; Lewis, M.; Mason, E.; Vohora, K.; Main, C.; Konstantinou, K.; Sowden, G.; Somerville, S.; Whitehurst, D.; et al., | 2011 | A randomised trial of targeted treatment for low back pain compared with current best practice: the start back trial                                                                                     | Exclusion reason: NOT journal publication.                                                                                                             |
| Bier, J. D.; Ostelo, Rwjg; Koes, B. W.; Verhagen, A. P.                                                                                  | 2017 | Validity and reproducibility of the modified STarT Back Tool (Dutch version) for patients with neck pain in primary care                                                                                 | Exclusion reason: NOT back pain.                                                                                                                       |



**Supplementary Table 3.** STarT Back and reliability and validity for low back pain

| Study                          | Year | Type LBP | Duration LBP | Overview                                               | Internal Consistency    | Test-retest | Construct Validity                                                                        | Discriminative Validity                                                             | Authors Conclusions                                                                                                                        |
|--------------------------------|------|----------|--------------|--------------------------------------------------------|-------------------------|-------------|-------------------------------------------------------------------------------------------|-------------------------------------------------------------------------------------|--------------------------------------------------------------------------------------------------------------------------------------------|
| Abedi et al. <sup>1</sup>      | 2015 | Chronic  | Non-specific | Translation and validation of the Persian STarT Back   | Cronbach $\alpha$ =0.83 |             | RMDQ=0.81, CSQ=0.70<br>TSK=0.71<br>HADS-A=0.75<br>HADS-D=0.72                             | 0.73-0.86 <sup>1</sup>                                                              | Authors conclude the Persian version is a reliable and valid instrument for screening NSLBP.                                               |
| Bier et al. <sup>2</sup>       | 2017 | 184      | Non-specific | Mixed                                                  |                         | Kappa=0.65  | 0.28-0.63*                                                                                |                                                                                     | Authors concluded that STarT Back was successfully translated into Dutch.                                                                  |
| Beneciuk et al. <sup>3</sup>   | 2013 | 146      | Non-specific | Mixed                                                  |                         |             | 0.28-0.63*                                                                                |                                                                                     | Authors conclude the data shows prediction of clinical outcome depends on domain of interest.                                              |
| Bruyere et al. <sup>4</sup>    | 2014 | Unclear  | Unclear      | Validity and reliability of the French STarT Back      | Cronbach $\alpha$ =0.74 | ICC=0.90    | VAS=0.66 RMDQ=0.74<br>OMPSQ=0.74                                                          |                                                                                     | Authors conclude that the French version is reliable and valid                                                                             |
| Hill et al. <sup>5</sup>       | 2008 | Mixed    | Non-specific | A primary care back pain screening tool                |                         |             |                                                                                           | RMDQ=0.92<br>Leg Pain=0.84<br>Bothersome=0.92<br>PCS=0.79<br>TSK=0.79<br>PHQ-2=0.74 | Authors concluded that further work is now needed to establish if the STarT Back can improve clinical outcomes through targeted treatment. |
| Karstens et al. <sup>6</sup>   | 2015 | Mixed    | Non-specific | Validation of the German STarT Back tool               | Cronbach $\alpha$ =0.52 | Kappa=0.67  | RMDQ=0.46<br>PCS=0.30<br>TSK=0.28<br>HADS-D=0.32                                          | RMDQ=0.76<br>PCS=0.70<br>HADS-D=0.71<br>Composite reference standard=0.77           | Authors conclude that the German STarT Back shows acceptable psychometric properties.                                                      |
| Luan et al. <sup>7</sup>       | 2014 | Unclear  | Unclear      | Adaption of the Chinese version of the STarT Back tool |                         | ICC=0.93    |                                                                                           |                                                                                     | Authors concluded the psychometric properties were reliable and valid.                                                                     |
| Matsudaira et al. <sup>8</sup> | 2016 | Unclear  | Unclear      | Psychometric properties of the Japanese STarT Back     | Cronbach $\alpha$ =0.75 |             | RMDQ=0.59<br>FABQ-PA=0.34<br>TSK=0.49<br>PCS=0.46<br>HADS=0.40<br>EQ-5D=-0.56<br>NRS=0.42 | RMDQ=0.83<br>Leg Pain=0.76<br>PCS=0.71<br>TSK=0.74<br>HADS=0.65                     | Authors concluded there is acceptable reliability and validity                                                                             |

|                                |      |         |              |                                                                                                         |                         |            |                                                                                           |           |                                                                                                                        |
|--------------------------------|------|---------|--------------|---------------------------------------------------------------------------------------------------------|-------------------------|------------|-------------------------------------------------------------------------------------------|-----------|------------------------------------------------------------------------------------------------------------------------|
| Piironen et al. <sup>9</sup>   | 2016 | Mixed   | Non-specific | Psychometric properties of the Finnish STarT Back tool                                                  | Cronbach $\alpha$ =0.52 | ICC=0.78   | BDI=0.38<br>ODI=0.38<br>OMPSQ=0.45<br>Pain Intensity=0.31<br>Leg Pain Intensity=0.45      |           | Authors concluded the Finnish translation showed to be linguistically accurate and acceptable for patient use.         |
| Yelvar et al. <sup>10</sup>    | 2019 | Mixed   | Non-specific | Validity and reliability of the Turkish STarT Back                                                      | Cronbach $\alpha$ =0.75 | ICC=0.90   | RMDQ=0.68<br>TSK=0.47<br>ODI=0.54<br>BDI=0.34                                             |           | Authors concluded the Turkish STarT Back reliability was perfect.                                                      |
| Pilz et al. <sup>11</sup>      | 2014 | Unclear | Unclear      | Brazilian version development of the STarT Back                                                         | Cronbach $\alpha$ =0.74 | Kappa=0.79 |                                                                                           |           | Authors concluded the translation and cross-cultural adaption was performed in a satisfactory manner.                  |
| Raimundo et al. <sup>12</sup>  | 2017 | Chronic | Unclear      | Portuguese translation of the STarT Back                                                                | Cronbach $\alpha$ =0.93 | Kappa=0.74 |                                                                                           |           | Authors concluded that future studies should analyse the validity different low back pain types                        |
| Robinson et al. <sup>13</sup>  | 2017 | Unclear | Unclear      | Reliability and screening ability of the STarT Back in physiotherapy practice                           | Cronbach $\alpha$ =0.51 | ICC=0.89   | TSK=0.40<br>PCS=0.27<br>HADS-A=0.41<br>HADS-D=0.26<br>PHQ-2=0.55<br>RMDQ=0.55<br>VAS=0.47 |           | Authors concluded the SBT is reliable and the screening ability is good.                                               |
| Aebischer et al. <sup>14</sup> | 2015 | Unclear | Non-specific | German adaption of the STarT Back tool                                                                  |                         |            |                                                                                           | RMDQ=0.79 | Authors conclude the German STarT Back showed appropriate convergent and discriminative validity in the tested sample. |
| Beneciuk et al. <sup>15</sup>  | 2015 | Mixed   | Non-specific | Subgrouping of patients with low back pain using a multidimensional cluster analysis and the STarT Back |                         |            |                                                                                           | 0.91*     | Authors concluded that the STarT Back can replace other unidimensional psychological measures.                         |
| Fuhro et al. <sup>16</sup>     | 2016 | Mixed   | Non-specific | Correlation and agreement analysis between the Orebro and STarT Back tools                              |                         |            | RMDQ=0.76<br>TSK=0.60<br>Pain NRS (last episode)=0.48<br>Pain NRS (prior 2 weeks)=0.43    |           | Authors conclude that the Orebro and STarT Back can be utilised by clinicians and researchers.                         |

|                           |      |         |              |                                                                  |  |  | Pain NRS (at assessment)=0.31                        |                                                                                                                                                                           |                                                                                                                          |
|---------------------------|------|---------|--------------|------------------------------------------------------------------|--|--|------------------------------------------------------|---------------------------------------------------------------------------------------------------------------------------------------------------------------------------|--------------------------------------------------------------------------------------------------------------------------|
| Hill et al. <sup>17</sup> | 2010 | Mixed   | Unclear      | Subgrouping with the STarT Back versus the Orebro tool           |  |  |                                                      | Bothered by back pain (very)=0.92<br>RMDQ=0.94<br>PCS=0.79<br>TSK=0.79<br>Pain NRS=0.83<br>Leg Pain=0.84<br>Comorbid pain=0.68<br>Time off work=0.89<br>Chronic pain=0.71 | Authors conclude that the STarT Back and the Orebro have similar discriminative abilities.                               |
| Pilz et al. <sup>18</sup> | 2017 | Unclear | Non-specific | Construct and discriminative ability of the Brazilian STarT Back |  |  | FABQ-W=0.18<br>FABQ-PA=0.28<br>RMDQ=0.70<br>ODI=0.61 | FABQ-W=0.71<br>FABQ-PA=0.66<br>RMDQ=0.88<br>ODI=0.81                                                                                                                      | Authors concluded SBST-Brazil is able to discriminate low back pain patients with disability and fear-avoidance beliefs. |

<sup>1</sup>Only range or total score provided

Construct validity noted as correlations, discriminative validity as area under the curve.

ICC=Intraclass Correlation Coefficient. RMDQ=Roland Morris Disability Questionnaire. ODI=Oswestry Disability Index. TSK=Tampa Scale of Kinesiophobia. PCS=Pain Catastrophizing Scale. FABQ=Fear-Avoidance Beliefs Questionnaire. FABQ-W=Fear-Avoidance Beliefs Questionnaire Work. FABQ-PA=Fear-Avoidance Beliefs Questionnaire Physical Activity. VAS=Visual Analogue Scale. NRS=Numeric Rating Scale. BDI=Beck Depression Inventory. HADS-A=Hospital Anxiety and Depression Scale – Anxiety. HADS-D=Hospital Anxiety and Depression Scale – Depression. PHQ-2=Patient Health Questionnaire 2. EQ-5D=EuroQol-5D. OMPSQ=Orebro Musculoskeletal Pain Questionnaire. CSQ=Coping Strategies Questionnaire.

**Supplementary Table 4.** STarT Back and prognosis for low back pain

| Study                         | Year | N   | Type LBP     | Duration LBP | Overview                                                                                                                | Follow-up Duration | Score vs Category | Pain prediction: Univariate  | Pain prediction: Multivariate* | Disability prediction: Univariate | Disability prediction: Multivariate <sup>1</sup> | Conclusions                                                                                                            |
|-------------------------------|------|-----|--------------|--------------|-------------------------------------------------------------------------------------------------------------------------|--------------------|-------------------|------------------------------|--------------------------------|-----------------------------------|--------------------------------------------------|------------------------------------------------------------------------------------------------------------------------|
| Bier et al. <sup>2</sup>      | 2017 | 184 | Non-specific | Mixed        | Validity and reproducibility of the Dutch version of the STarT Back                                                     | 3mo                | Category          | Y                            | -                              | Y                                 | -                                                | Authors concluded that STarT Back was successfully translated into Dutch.                                              |
| Beneciuk et al. <sup>3</sup>  | 2013 | 146 | Non-specific | Mixed        | Prognostic capabilities of the STarT Back tool in an outpatient physical therapy setting                                | 6mo                | Score             | -                            | N                              | -                                 | Y                                                | Authors conclude the data shows prediction of clinical outcome depends on domain of interest.                          |
| Azevedo et al. <sup>19</sup>  | 2019 | 148 | Non-specific | Chronic      | Baseline characteristics to assess people who respond best to Movement System Impairment-Based classification treatment | 2mo                | Category          | N                            | -                              | N                                 | -                                                | Authors conclude the STarT Back tool did not modify the effect of an 8-week treatment protocol                         |
| Beneciuk et al. <sup>20</sup> | 2014 | 123 | Non-specific | Mixed        | Predicting 6-month change patterns in an outpatient physical therapy setting                                            | 6mo                | Category          | -                            | N                              | -                                 | Y                                                | Authors conclude reliance on initial SBT high-risk categorisation as an indicator for disability may have limitations. |
| Field et al. <sup>21</sup>    | 2012 | 404 | Non-specific | Mixed        | Prognosis of STarT Back for recovery with spinal manipulative therapy                                                   | 90d                | Category          | N                            | -                              | N                                 | -                                                | Authors conclude that the STarT Back does to predict risk of poor outcome based on categorisation.                     |
| Friedman et al. <sup>22</sup> | 2018 | 354 | Non-specific | Acute        | Does pain one week after emergency department visit predict poor outcome for acute low back pain.                       | 3mo                | Category          | N                            | N                              | N                                 | N                                                | Authors concluded that the STarT Back was not associated with poor outcomes in this cohort.                            |
| George et al. <sup>23</sup>   | 2015 | 111 | Non-specific | Mixed        | Psychological predictors of                                                                                             | 6mo                | Category          | Y (combined with disability) | -                              | Y (combined with pain)            | -                                                | Authors concluded psychological risk                                                                                   |

|                                 |      |      |         |         |                                                                                            |      |          |                              |   |                        |   |                                                                                                                       |
|---------------------------------|------|------|---------|---------|--------------------------------------------------------------------------------------------|------|----------|------------------------------|---|------------------------|---|-----------------------------------------------------------------------------------------------------------------------|
|                                 |      |      |         |         | recovery from low back pain                                                                |      |          |                              |   |                        |   | status, depressive symptoms, and pain intensity were predictive of 6 months outcomes.                                 |
| Karran et al. <sup>24</sup>     | 2017 | 195  | Unclear | Mixed   | The value of a prognostic screening tool for patients with low back pain in secondary care | 4mo  | Category | Y (combined with disability) | - | Y (combined with pain) | - | Authors conclude modified screening strategies that could offer clinical value need to be considered.                 |
| Karstens et al. <sup>25</sup>   | 2019 | 294  | Unclear | Chronic | Prognostic capability of the German STarT Back tool                                        | 12mo | Category | Y                            | - | Y                      | Y | Authors concluded the disability differences are in accordance with subgroups.                                        |
| Katzan et al. <sup>26</sup>     | 2019 | 1169 | Unclear | Unclear | The STarT Back screening tool to predict functional disability.                            | 45d  | Category | -                            | - | Y                      | - | Authors conclude the STarT Back predicts outcomes of physiotherapy in a real world setting.                           |
| Kendell et al. <sup>27</sup>    | 2018 | 290  | Unclear | Chronic | Predictive ability of the STarT Back tool in chronic low back pain                         | 12mo | Category | Y                            | - | Y                      | - | Authors concluded that this study provides information on the usefulness for the STarT Back in chronic low back pain. |
| Kongsted et al. <sup>28</sup>   | 2016 | 859  | Unclear | Mixed   | Prediction of outcome in patients with low back pain                                       | 12mo | Category | N                            | - | Y                      | - | Authors concluded that Chiropractors were able to predict outcomes as well as the STarT Back.                         |
| Matsudaira et al. <sup>29</sup> | 2017 | 1228 | Unclear | Unclear | Japanese STarT Back predicts clinical outcomes                                             | 6mo  | Category | Y                            | - | Y                      | - | Authors concluded the Japanese STarT Back predicted 6-month pain and                                                  |

|                               |      |      |              |         |                                                                                                  |      |          |    |   |    |   |  |                                                                                                                     |
|-------------------------------|------|------|--------------|---------|--------------------------------------------------------------------------------------------------|------|----------|----|---|----|---|--|---------------------------------------------------------------------------------------------------------------------|
|                               |      |      |              |         |                                                                                                  |      |          |    |   |    |   |  | disability outcomes.                                                                                                |
| Medeiros et al. <sup>30</sup> | 2017 | 148  | Non-specific | Chronic | Longitudinal monitoring of patients with chronic low back pain                                   | 6mo  | Category | -  | Y | -  | Y |  | Authors concluded it was possible to detect changes in the risk classification of the STarT Back.                   |
| Medeiros et al. <sup>31</sup> | 2018 | 200  | Non-specific | Acute   | STarT Back in the emergency department for acute low back pain                                   | 6mo  | Category | -  | Y | -  | N |  | Authors conclude that studies are needed to test the use of stratification tools in emergency departments.          |
| Mehling et al. <sup>32</sup>  | 2015 | 605  | Unclear      | Acute   | To assess if the STarT Back can classify acute low back pain patients at high risk of chronicity | 24mo | Category | NR | - | NR | - |  | Authors concluded the STarT Back tool should be used cautiously in patients with acute low back pain.               |
| Morso et al. <sup>33</sup>    | 2013 | 928  | Unclear      | Unclear | Predictive and external validity of the STarT Back in Danish primary care                        | 12mo | Category | Y  | N | Y  | Y |  | Authors concluded SBT is suitable for a triage tool.                                                                |
| Morso et al. <sup>34</sup>    | 2014 | 344  | Non-specific | Mixed   | Predictive ability of the STarT Back in a Danish secondary care setting                          | 3mo  | Category | -  | - | Y  | - |  | Authors conclude STarT Back tool is less able to predict outcome in secondary care setting compared to primary care |
| Nielsen et al. <sup>35</sup>  | 2017 | 1132 | Other        | Mixed   | Latent class analysis derived sub-groups of low back pain and their prognostic capacity          | 6mo  | Category | -  | - | Y  | - |  | Authors conclude the lower prognostic capacity from two-stage subgrouping may be from information loss.             |
| Page et al. <sup>36</sup>     | 2015 | 53   | Non-specific | Chronic | Chronic low back pain and prognosis of clinical outcomes using the STarT Back screening tool     | 12mo | Score    | Y  | - | Y  | - |  | Authors conclude the STarT Back can identify prognosis.                                                             |

|                                |      |      |              |         |                                                                                        |      |          |   |   |   |   |                                                                                                              |
|--------------------------------|------|------|--------------|---------|----------------------------------------------------------------------------------------|------|----------|---|---|---|---|--------------------------------------------------------------------------------------------------------------|
| Riis et al. <sup>37</sup>      | 2017 | 441  | Non-specific | Unclear | Predictive ability of the STarT Back in a Danish general practice cohort               | 12mo | Category | - | - | Y | Y | Authors concluded the STarT Back was predictive of functional impairments.                                   |
| Storm et al. <sup>38</sup>     | 2018 | 166  | Specific     | Surgery | Usefulness of the STarTBack for predicting pain problems after lumbar spine surgery    | 12mo | Category | N | - | - | - | Authors concluded the STarT Back could be used as a screening tool to guide treatment in surgery patients.   |
| Suri et al. <sup>39</sup>      | 2018 | 1109 | Non-specific | Mixed   | Predictive validity of STarT Back in US primary care setting.                          | 6mo  | Category | - | - | Y | - | Authors concluded that the STarT Back successfully separated people with back pain.                          |
| Tan et al. <sup>40</sup>       | 2018 | 177  | Non-specific | Acute   | Predicting outcomes for acute low back pain in the emergency department                | 6mo  | Score    | Y | - | - | - | Authors conclude SBT total score has a predictive value for long-term pain.                                  |
| Toh et al. <sup>41</sup>       | 2017 | 207  | Unclear      | Mixed   | STarT Back tool for predicting back pain intensity in outpatient physiotherapy setting | 12wk | Category | Y | - | - | - | Authors concluded psychological sub-score was greater than total score for predicting future pain intensity. |
| Von Korff et al. <sup>42</sup> | 2014 | 571  | Unclear      | Mixed   | Comparison of back pain prognostic risk stratification tools                           | 4mo  | Score    | - | - | Y | - | Authors concluded there is comparable predictive validity amongst items.                                     |

Pain and disability measures consider if the result was significant in either univariate analyses or in <sup>1</sup>multivariate analyses which was adjusted for baseline pain or disability (respective to outcome).

**Supplementary Table 5.** STarT Back in trials for low back pain.<sup>1</sup>

| Study                        | Year | N<br>INT | N<br>CON | Type LBP     | Duration LBP | Overview                                                           | Study<br>Duration | Pain Results Significant <sup>2</sup> | Disability Results<br>Significant <sup>2</sup> | Cost Results Significant* | Authors<br>Conclusions                                                                                                             |
|------------------------------|------|----------|----------|--------------|--------------|--------------------------------------------------------------------|-------------------|---------------------------------------|------------------------------------------------|---------------------------|------------------------------------------------------------------------------------------------------------------------------------|
| Cherkin et al. <sup>43</sup> | 2018 | 756      | 945      | Non-specific | Mixed        | Effect of risk stratification on patient outcomes and care process | 6mo               | N                                     | N                                              | -                         | Authors concluded the STarTBack did not improve patient outcomes in a US population.                                               |
| Hill et al. <sup>44</sup>    | 2011 | 568      | 283      | Non-specific | Mixed        | Comparison of stratified care for management of low back pain      | 12mo              | N                                     | Y                                              | N                         | Authors concluded stratified management of low back pain significantly improves care.                                              |
| Murphy et al. <sup>45</sup>  | 2016 | 251      | 332      | Non-specific | Chronic      | A non-randomised trial of stratified care versus usual group care  | 3mo               | Y                                     | Y                                              | -                         | Authors concluded that stratified care is effective for management of low back pain compared to usual care.                        |
| Foster et al. <sup>46</sup>  | 2014 | 544      | 368      | Non-specific | Mixed        | Effect of stratified care for low back pain in family practice     | 6mo               | N                                     | Y                                              | N                         | Authors concluded stratified care has more benefits and targeted use of healthcare resources without increasing health care costs. |

<sup>1</sup>Cherkin and Hill et al are randomised trials, Murphy and Foster are non-randomised.

<sup>2</sup>Significant in favour of STarTBack classification treatment



**Supplementary Table 6.** Reasons for exclusion at full-text screening for McKenzie studies.

| <b>Authors</b>                                                             | <b>Year</b> | <b>Title</b>                                                                                                                                       | <b>Exclusion Reason</b>                                                                                                                     |
|----------------------------------------------------------------------------|-------------|----------------------------------------------------------------------------------------------------------------------------------------------------|---------------------------------------------------------------------------------------------------------------------------------------------|
| Yarznbowicz, Richard;<br>Tao, Minjing                                      | 2018        | Directional preference constructs for patients' low back pain in the absence of centralization.                                                    | Exclusion reason: NOT reliability, validity, prognosis using tool for categorisation OR RCT using tool for group assignment (study design). |
| Kilpikoski, S; Alen, M; Paatelma, M; Simonen, R; Heinonen, A; Videman, T   | 2009        | Outcome comparison among working adults with centralizing low back pain: secondary analysis of a randomized controlled trial with 1-year follow-up | Exclusion reason: NOT McKenzie classification.                                                                                              |
| Gillan, M. G.; Ross, J. C.; McLean, I. P.; Porter, R. W.                   | 1998        | The natural history of trunk list, its associated disability and the influence of McKenzie management.                                             | Exclusion reason: NOT McKenzie classification.                                                                                              |
| Donelson R.; Silva G.; Murphy K.                                           | 1990        | Centralization phenomenon. It usefulness in evaluating and treating referred pain                                                                  | Exclusion reason: NOT reliability, validity, prognosis using tool for categorisation OR RCT using tool for group assignment (study design). |
| Guranowski T.; KuliÅ„ski WÅ„.; Lipiec Z.                                   | 2002        | Local experience in the treatment of low back pain using the Mckenzie method                                                                       | Exclusion reason: NOT English language publication.                                                                                         |
| de Bruijn N; Doumen BM; de Mulder K; Ostelo RWJ; Nelissen-de Vos YCM       | 2003        | Intra- and inter-tester reliability of the movement loss tests of the McKenzie assessment for the lumbar spine.                                    | Exclusion reason: NOT English language publication.                                                                                         |
| Yamin, Faisal; Atiq-ur-Rehman; Aziz, Saima; Zeya, Nazia; Choughley, Ahlaam | 2016        | To Compare the Effectiveness of McKenzie Exercises v/s General Conditioning Exercises in Low Back Pain.                                            | Exclusion reason: NOT McKenzie classification.                                                                                              |
| Waqqar, Saira; Shakil-Ur-Rehman, Syed; Ahmad, Shakeel                      | 2016        | McKenzie treatment versus mulligan sustained natural apophyseal glides for chronic mechanical low back pain.                                       | Exclusion reason: NOT McKenzie classification.                                                                                              |
| van Ravensberg CDD; Oostendorp RAB; van                                    | 2005        | Physical therapy and manual physical therapy:                                                                                                      | Exclusion reason: NOT McKenzie classification.                                                                                              |

|                                                                                                                          |      |                                                                                                                                                                                       |                                                                                                                                             |
|--------------------------------------------------------------------------------------------------------------------------|------|---------------------------------------------------------------------------------------------------------------------------------------------------------------------------------------|---------------------------------------------------------------------------------------------------------------------------------------------|
| Berkel LM; Scholten-Peeters GGM; Pool JJM; Swinkels RAH; Huijbregts PA                                                   |      | differences in patient characteristics.                                                                                                                                               |                                                                                                                                             |
| Tonosu, J; Matsudaira, K; Oka, H; Okazaki, H; Oshio, T; Hanaoka, I; Muraoka, Y; Midorikawa, M; Wakabayashi, K; Tanaka, S | 2016 | A population approach to analyze the effectiveness of a back extension exercise "One Stretch" in patients with low back pain: a replication study                                     | Exclusion reason: NOT reliability, validity, prognosis using tool for categorisation OR RCT using tool for group assignment (study design). |
| Szulc, P; Wendt, M; Waszak, M; Tomczak, M; Cieslik, K; Trzaska, T                                                        | 2015 | Impact of McKenzie Method Therapy Enriched by Muscular Energy Techniques on Subjective and Objective Parameters Related to Spine Function in Patients with Chronic Low Back Pain      | Exclusion reason: NOT McKenzie classification.                                                                                              |
| Stankovic R.; Johnell O.                                                                                                 | 1995 | Conservative treatment of acute low back pain: A 5-year follow-up study of two methods of treatment                                                                                   | Exclusion reason: NOT McKenzie classification.                                                                                              |
| Stankovic, R.; Johnell, O.                                                                                               | 1990 | Conservative treatment of acute low-back pain. A prospective randomized trial: McKenzie method of treatment versus patient education in "mini back school".                           | Exclusion reason: NOT McKenzie classification.                                                                                              |
| Skikic, Emela Mujic; Suad, Trebinjac                                                                                     | 2003 | The effects of McKenzie exercises for patients with low back pain, our experience.                                                                                                    | Exclusion reason: NOT Clinical Trial.                                                                                                       |
| Sheth, Arpit; Arora, Anu; Yardi, Sujata                                                                                  | 2014 | Efficacy of Maitland's Spinal Mobilizations Versus Mckenzie Press-Up Exercises on Pain, Range of Motion and Functional Disability in Subjects with non Radiating Acute Low Back Pain. | Exclusion reason: NOT McKenzie classification.                                                                                              |
| Sheets, Charles; Machado, Luciana A. C.; Hancock, Mark; Maher, Chris                                                     | 2012 | Can we predict response to the McKenzie method in patients with acute low back pain? A secondary analysis of a randomized controlled trial.                                           | Exclusion reason: NOT reliability, validity, prognosis using tool for categorisation OR RCT using tool for group assignment (study design). |

|                                                                                      |      |                                                                                                                                                                                               |                                                                                                                                             |
|--------------------------------------------------------------------------------------|------|-----------------------------------------------------------------------------------------------------------------------------------------------------------------------------------------------|---------------------------------------------------------------------------------------------------------------------------------------------|
| Schenk R.J.; Jozefczyk C.; Kopf A.                                                   | 2003 | A randomized trial comparing interventions in patients with lumbar posterior derangement                                                                                                      | Exclusion reason: NOT McKenzie classification.                                                                                              |
| Ponte D.J.; Jensen G.J.; Kent B.E.                                                   | 1984 | A preliminary report on the use of the McKenzie protocol versus Williams protocol in the treatment of low back pain                                                                           | Exclusion reason: NOT McKenzie classification.                                                                                              |
| Petersen, Tom; Larsen, Kristian; Jacobsen, Soren                                     | 2007 | One-year follow-up comparison of the effectiveness of McKenzie treatment and strengthening training for patients with chronic low back pain: outcome and prognostic factors.                  | Exclusion reason: NOT reliability, validity, prognosis using tool for categorisation OR RCT using tool for group assignment (study design). |
| Petersen, Tom; Kryger, Peter; Ekdahl, C.; Olsen, Steen; Jacobsen, Soren              | 2002 | The effect of McKenzie therapy as compared with that of intensive strengthening training for the treatment of patients with subacute or chronic low back pain: A randomized controlled trial. | Exclusion reason: Duplicate.                                                                                                                |
| Nwuga, G; Nwuga, V                                                                   | 1985 | Relative therapeutic efficacy of the Williams and McKenzie protocols in back pain management                                                                                                  | Exclusion reason: NOT McKenzie classification.                                                                                              |
| Murtezani, A; Govori, V; Meka, VS; Ibraimi, Z; Rrecaj, S; Gashi, S                   | 2015 | A comparison of mckenzie therapy with electrophysical agents for the treatment of work related low back pain: a randomized controlled trial                                                   | Exclusion reason: NOT McKenzie classification.                                                                                              |
| Mbada, C; Olaoye, M; Ayanniyi, O; Johnson, O; Odole, A; Dada, O                      | 2017 | Comparative efficacy of clinic-based and telerehabilitation application of mckenzie therapy in low-back pain                                                                                  | Exclusion reason: NOT journal article.                                                                                                      |
| Mbada C.E.; Ayanniyi O.; Ogunlade S.O.; Orimolade E.A.; Oladiran A.B.; Ogundele A.O. | 2014 | Influence of Mckenzie protocol and two modes of endurance exercises on health-related quality of life of patients with long-term mechanical low-back pain                                     | Exclusion reason: NOT reliability, validity, prognosis using tool for categorisation OR RCT using tool for group assignment (study design). |
| Matsudaira, K; Hiroe, M; Kikkawa, M; Sawada, T; Suzuki, M;                           | 2015 | Can standing back extension exercise improve or prevent low                                                                                                                                   | Exclusion reason: NOT McKenzie classification.                                                                                              |

|                                                                                                                                 |      |                                                                                                                                                                                                        |                                                                                                                                             |
|---------------------------------------------------------------------------------------------------------------------------------|------|--------------------------------------------------------------------------------------------------------------------------------------------------------------------------------------------------------|---------------------------------------------------------------------------------------------------------------------------------------------|
| Isomura, T; Oka, H; Hiroe, K                                                                                                    |      | back pain in Japanese care workers?                                                                                                                                                                    |                                                                                                                                             |
| Limback Svensson G.; Kjellby Wendt G.; Thomee R.                                                                                | 2015 | The occurrence of centralisation of pain after mckenzie therapy for patients with mri-verified lumbar disc herniation and long-standing pain                                                           | Exclusion reason: NOT journal article.                                                                                                      |
| HosseiniFar, Mohammad; Akbari, Mohammad; Behtash, Hamid; Amiri, Mohsen; Sarrafzadeh, Javad                                      | 2013 | The Effects of Stabilization and Mckenzie Exercises on Transverse Abdominis and Multifidus Muscle Thickness, Pain, and Disability: A Randomized Controlled Trial in NonSpecific Chronic Low Back Pain. | Exclusion reason: NOT McKenzie classification.                                                                                              |
| Hasanpour-Dehkordi, Ali; Dehghani, Arman; Solati, Kamal                                                                         | 2017 | A Comparison of the Effects of Pilates and McKenzie Training on Pain and General Health in Men with Chronic Low Back Pain: A Randomized Trial.                                                         | Exclusion reason: NOT McKenzie classification.                                                                                              |
| Halliday, Mark H.; Pappas, Evangelos; Hancock, Mark J.; Clare, Helen A.; Pinto, Rafael Z.; Robertson, Gavin; Ferreira, Paulo H. | 2018 | A randomized clinical trial comparing the McKenzie method and motor control exercises in people with chronic low back pain and a directional preference.                                               | Exclusion reason: Duplicate.                                                                                                                |
| Gard G; Gille KA; Degerfeldt L                                                                                                  | 2000 | McKenzie method and functional training in back pain rehabilitation. A brief review including results from a four-week rehabilitation programme.                                                       | Exclusion reason: NOT reliability, validity, prognosis using tool for categorisation OR RCT using tool for group assignment (study design). |
| Garcia, Alessandra N.; Gondo, Francine L. B.; Costa, Renata A.; Cyrillo, Fabio N.; Costa, Leonardo O. P.                        | 2011 | Effects of two physical therapy interventions in patients with chronic non-specific low back pain: feasibility of a randomized controlled trial.                                                       | Exclusion reason: Duplicate.                                                                                                                |
| Donelson R.; Aprill C.; Medcalf R.; Grant W.                                                                                    | 1997 | A prospective study of centralization of lumbar and referred pain: A predictor of symptomatic discs and anular competence                                                                              | Exclusion reason: NOT reliability, validity, prognosis using tool for categorisation OR RCT using tool for group assignment (study design). |

|                                                                                  |      |                                                                                                                                              |                                                                                                                                             |
|----------------------------------------------------------------------------------|------|----------------------------------------------------------------------------------------------------------------------------------------------|---------------------------------------------------------------------------------------------------------------------------------------------|
| Deutscher, D.; Werneke, M. W.; Gottlieb, D.; Fritz, J. M.; Resnik, L.            | 2015 | Physical therapists' level of mckenzie education, functional outcomes, and utilization in patients with low back pain.                       | Exclusion reason: NOT reliability, validity, prognosis using tool for categorisation OR RCT using tool for group assignment (study design). |
| Clare, Helen A.; Adams, Roger; Maher, Christopher G.                             | 2007 | Construct validity of lumbar extension measures in McKenzie's derangement syndrome.                                                          | Exclusion reason: NOT McKenzie classification.                                                                                              |
| Clare HA; Adams R; Maher CG                                                      | 2004 | Reliability of the McKenzie spinal pain classification using patient assessment forms.                                                       | Exclusion reason: NOT back pain.                                                                                                            |
| Ali, S; Ali, SM; Memon, KN                                                       | 2013 | Effectiveness of core stabilization exercises versus McKenzie's exercises in chronic lower back pain                                         | Exclusion reason: NOT McKenzie classification.                                                                                              |
| Al-Obaidi, Saud M.; Al-Sayegh, Nowall A.; Ben Nakhi, Huzaifa; Al-Mandeel, Mariam | 2011 | Evaluation of the McKenzie intervention for chronic low back pain by using selected physical and bio-behavioral outcome measures.            | Exclusion reason: NOT Clinical Trial.                                                                                                       |
| Werneke M.W.; Hart D.L.                                                          | 2005 | Centralization: Association between repeated end-range pain responses and behavioral signs in patients with acute non-specific low back pain | Exclusion reason: NOT reliability, validity, prognosis using tool for categorisation OR RCT using tool for group assignment (study design). |
| May S; Ross J                                                                    | 2009 | The McKenzie classification system in the extremities: a reliability study using Mckenzie [sic] assessment forms and experienced clinicians. | Exclusion reason: NOT back pain.                                                                                                            |
| Hiroshi Takasaki                                                                 | 2016 | Agreement of Mechanical Diagnosis and Therapy Classification in People With Extremity Conditions.                                            | Exclusion reason: NOT back pain.                                                                                                            |
| Hefford, Cheryl                                                                  | 2008 | McKenzie classification of mechanical spinal pain: profile of syndromes and directions of preference.                                        | Exclusion reason: NOT reliability, validity, prognosis using tool for categorisation OR RCT using tool for group                            |

|                                           |      |                                                                                                                                                |                                                     |
|-------------------------------------------|------|------------------------------------------------------------------------------------------------------------------------------------------------|-----------------------------------------------------|
|                                           |      |                                                                                                                                                | assignment (study design).                          |
| Donelson R.G.; Spratt K.F.                | 2016 | The impact of a precise mechanical diagnosis for low back pain: A cost comparison with standard community care                                 | Exclusion reason: NOT journal article.              |
| Gohil, D; Samuel, R                       | 2018 | The efficacy of a lumbar strengthening program in lumbar spine derangement syndrome 1                                                          | Exclusion reason: NOT journal article.              |
| Fiddian, J; Marx, J                       | 1986 | Comparison of passive mobilization and McKenzie protocol in treatment of low back pain                                                         | Exclusion reason: NOT journal article.              |
| Cheng P.; Bi X.; Shen X.-L.               | 2002 | Treatment of lower back pain: Application and evaluation of the McKenzie method                                                                | Exclusion reason: NOT English language publication. |
| Sedaghati, P; Arjmand, A; Sedaghati, N    | 2017 | Comparison of the effects of different training approaches on dynamic balance and pain intensity in the patients with chronic back pain        | Exclusion reason: NOT English language publication. |
| Morko A.; Truszczyńska A.; Reszelewska D. | 2014 | Inter-rater reliability of McKenzie functional diagnosis of low back pain patients between - The instructor and physiotherapist after A course | Exclusion reason: NOT English language publication. |
| Moncelon, S; Otero, J                     | 2015 | The McKenzie method of mechanical diagnosis and therapy in chronic low back pain with directional preference                                   | Exclusion reason: NOT English language publication. |

**Supplementary Table 7. McKenzie assessment and reliability or classification for low back pain**

| Study                           | Year | N LBP | Type LBP     | Duration LBP | Overview                                                                        | Reliability     | Classification %                                                                                                 | Authors Conclusions                                                                                                          |
|---------------------------------|------|-------|--------------|--------------|---------------------------------------------------------------------------------|-----------------|------------------------------------------------------------------------------------------------------------------|------------------------------------------------------------------------------------------------------------------------------|
| Clare et al. <sup>47</sup>      | 2003 | 45    | Unclear      | Unclear      | Reliability to detect a lumbar lateral shift                                    | Kappa=0.26-0.38 |                                                                                                                  | Authors concluded that lateral shift judgements have only moderate reliability.                                              |
| Clare et al. <sup>48</sup>      | 2007 | 25    | Unclear      | Mixed        | Reliability of McKenzie in cervical and lumbar pain                             | Kappa=0.89-1.00 |                                                                                                                  | Authors concluded that the McKenzie assessment is reliable when performed by McKenzie trained therapists.                    |
| Donahue et al. <sup>49</sup>    | 1996 | 49    | Unclear      | Mixed        | Intertester reliability of lateral shift assessments in low back pain           | Kappa=0.16      |                                                                                                                  | Authors concluded the role of lateral shift assessment in the McKenzie method should be reconsidered.                        |
| Flavell et al. <sup>50</sup>    | 2016 | 150   | Non-specific | Chronic      | Classification characteristics of chronic low back pain                         |                 | Dysfunction syndrome=36%,<br>Derangement syndrome=32%,<br>Mechanically inconclusive=31%,<br>Postural syndrome=1% | Authors concluded that using a combined McKenzie classification helped improve the accuracy.                                 |
| Fritz et al. <sup>51</sup>      | 2000 | 12    | Non-specific | Unclear      | Reliability of the centralisation phenomenon                                    | Kappa=0.76-0.87 |                                                                                                                  | Authors concluded that examiners provided with clear definitions has substantial agreement, regardless of examiner training. |
| Kilby et al. <sup>52</sup>      | 1990 | 41    | Unclear      | Unclear      | The reliability of back pain assessment with the McKenzie Algorithm             | Kappa=0.51      |                                                                                                                  | Authors concluded with the exception of three areas, the algorithm was reliable.                                             |
| Kilpikoski et al. <sup>53</sup> | 2002 | 39    | Non-specific | Mixed        | Interexaminer reliability of the low back pain using the McKenzie method        | Kappa=0.2-0.9   |                                                                                                                  | Authors concluded that the interexaminer reliability of the McKenzie examination is high when therapists have been trained.  |
| Razmjou et al. <sup>54</sup>    | 2000 | 45    | Non-specific | Mixed        | Intertester reliability of the McKenzie evaluation for mechanical low back pain | Kappa=0.52-1.00 |                                                                                                                  | Authors concluded that therapists trained in McKenzie evaluation are highly reliable in reaching the same conclusion.        |

|                              |      |      |         |         |                                                                                         |                 |  |                                                                                                                  |
|------------------------------|------|------|---------|---------|-----------------------------------------------------------------------------------------|-----------------|--|------------------------------------------------------------------------------------------------------------------|
| Riddle et al. <sup>55</sup>  | 1993 | 363  | Unclear | Unclear | Intertester reliability of McKenzie in low back pain                                    | Kappa=0.02-0.48 |  | Authors concluded that intertester reliability in patients with low back pain using the McKenzie system is poor. |
| Seymour et al. <sup>56</sup> | 2002 | 15   | Unclear | Unclear | Reliability of detecting a lateral shift in lumbar derangement                          | Kappa=0.56      |  | Authors concluded the reliability for detecting a lateral shift may be higher than previously reported.          |
| Werneke et al. <sup>57</sup> | 2014 | 1662 | Unclear | Mixed   | Inter-rater agreement by physical therapists with different levels of McKenzie training | Kappa=0.11-0.44 |  | Authors concluded the level of agreement for judging McKenzie syndromes did not reach acceptable agreement.      |



**Supplementary Table 8.** McKenzie classification and prognosis for low back pain

| Study                         | Year | N   | Type LBP     | Duration LBP | Overview                                                                                                | Follow-up Duration | Factors                                     | Pain prediction: Univariate | Pain prediction: Multivariate* | Disability prediction: Univariate | Disability prediction: Multivariate* | Conclusions                                                                                                                                                    |
|-------------------------------|------|-----|--------------|--------------|---------------------------------------------------------------------------------------------------------|--------------------|---------------------------------------------|-----------------------------|--------------------------------|-----------------------------------|--------------------------------------|----------------------------------------------------------------------------------------------------------------------------------------------------------------|
| Edmond et al. <sup>58</sup>   | 2019 | 801 | Non-specific | Chronic      | The association between directional preference and treatment outcomes from graded activity and exposure | NR                 | Directional preference vs no preference     | Y                           | -                              | Y                                 | -                                    | Authors concluded that subjects manage by McKenzie credential clinicians, there was no added benefit of graded activity in those with a directional preference |
| Garcia et al. <sup>59</sup>   | 2016 | 140 | Non-specific | Chronic      | Identifying patients with chronic low back pain who respond best to mechanical diagnosis and therapy.   | 4wk                | Presence of clear centralization            | N                           | -                              | N                                 | -                                    | Authors concluded clear centralization was not an effect modifier                                                                                              |
| Karas et al. <sup>60</sup>    | 1997 | 126 | Non-specific | Mixed        | The relationship between centralization and prediction of return to work                                | 6mo                | Centralizers vs no centralization           | -                           | -                              | Y                                 | -                                    | Authors concluded that individuals who do not centralize their symptoms and have high Waddell scores are unlikely to return to work.                           |
| Long et al. <sup>61</sup>     | 2008 | 312 | Non-specific | Mixed        | The comparative prognostic value of directional preference and centralization                           | 2wk                | Treatment matched to directional preference | -                           | -                              | Y                                 | -                                    | Authors concluded subgroup matched treatment appears to be a useful tool for treatment prognosis.                                                              |
| Petersen et al. <sup>62</sup> | 2011 | 350 | Non-specific | Mixed        | McKenzie compared to manipulations when used as an adjunctive therapy                                   | 12wk               | Centralizers vs peripheralizers             | -                           | -                              | N                                 | -                                    | Authors concluded that the results of this study support the value of classification approaches for management of low back pain.                               |
| Petersen et al. <sup>63</sup> | 2015 | 350 | Non-specific | Chronic      | Predicting important change in patients with low back pain following McKenzie                           | 12wk               | Centralizers vs peripheralizers             | -                           | -                              | N                                 | -                                    | Authors concluded, although not significant, nerve root involvement                                                                                            |

|                                  |      |     |              |         |                                                                                              |      |                                                                                      |                |   |                |   |                                                                                                                                                |
|----------------------------------|------|-----|--------------|---------|----------------------------------------------------------------------------------------------|------|--------------------------------------------------------------------------------------|----------------|---|----------------|---|------------------------------------------------------------------------------------------------------------------------------------------------|
|                                  |      |     |              |         | therapy or spinal manipulation                                                               |      |                                                                                      |                |   |                |   | and peripheralisation appear to be promising effect modifiers.                                                                                 |
| Sufka et al. <sup>64</sup>       | 1998 | 36  | Unclear      | Mixed   | Centralization on functional outcomes in low back pain                                       | 2wk  | Centralizers vs no centralization                                                    | -              | - | N              | - | Authors concluded show greater improvements in function when there is complete centralization.                                                 |
| Werneke et al. <sup>65</sup>     | 2001 | 223 | Non-specific | Acute   | Centralization as a prognostic factor for chronic low back pain and disability               | 52wk | Pain pattern classification                                                          | Y              | - | -              | - | Authors conclude pain pattern classification was a predictive variable of the development of chronic pain and disability.                      |
| Werneke et al. <sup>66</sup>     | 2016 | 723 | Unclear      | Unclear | Effect of adding McKenzie factors to a risk-adjusted model for predicting functional status  | NR   | Pain pattern classification                                                          | -              | - | N              | N | Authors concluded that classification approaches resulted in small non-significant improvement for explaining variance in functional outcomes. |
| Werneke et al. <sup>67</sup>     | 2018 | 138 | Non-specific | Unclear | Directional preference and functional outcomes among subjects with high STarT risk           | NR   | Directional preference vs no preference                                              | -              | - | Y              | Y | Authors concluded that patients with directional preference on the first visit have greater improvements in function than those who do not.    |
| Yarznbowicz et al. <sup>68</sup> | 2018 | 639 | Unclear      | Chronic | Pain pattern classification and directional preference on clinical outcomes in low back pain | NR   | Directional preference, no directional preference, centralization, no classification | Y <sup>1</sup> | - | Y <sup>2</sup> | - | Authors concluded the findings may corroborate previous research and may assist providers in predicting clinical outcomes.                     |

Pain and disability measures consider if the result was significant in either univariate analyses or in \*multivariate analyses which was adjusted for baseline pain or disability (respective to outcome).

---

<sup>1</sup>Pain intensity significant for (Comparison vs Reference): DP & Non-Cen vs DP & Cen, Non-DP & Non-Cen vs DP & Cen, Non-DP & Non-Cen vs DP & No classification, Non-DP & Non-Cen vs DP & Non-Cen, Non-DP & Non-Cen vs Non-DP and no classification. No other significant comparisons observed.

<sup>2</sup>Disability significant for (Comparison vs Reference): DP & Non-Cen vs DP & Cen, Non-DP & Non-Cen vs DP & Cen, Non-DP & Non-Cen vs DP & No classification, Non-DP & Non-Cen vs DP & Non-Cen, Non-DP & Non-Cen vs Non-DP and no classification. No other significant comparisons observed.

**Supplementary Table 9.** McKenzie in trials for low back pain.<sup>1</sup>

| Study                         | Year | N                                                | Type LBP     | Duration LBP | Overview                                                                                 | Study Duration | Pain Results Significant <sup>2</sup> | Disability Results Significant <sup>2</sup> | Cost Results Significant <sup>2</sup> | Authors Conclusions                                                                                                                                                             |
|-------------------------------|------|--------------------------------------------------|--------------|--------------|------------------------------------------------------------------------------------------|----------------|---------------------------------------|---------------------------------------------|---------------------------------------|---------------------------------------------------------------------------------------------------------------------------------------------------------------------------------|
| Bid et al. <sup>69</sup>      | 2017 | McKenzie: 64<br>Physio: 64                       | Non-specific | Chronic      | A study on McKenzie versus conventional physiotherapy for central sensitization          | 8wk            | Y                                     | Y                                           | -                                     | Authors concluded that a McKenzie program can be used to reduce pain, central sensitization and disability.                                                                     |
| Cherkin et al. <sup>70</sup>  | 1998 | McKenzie: 133<br>Chiro: 122<br>Booklet: 66       | Non-specific | Unclear      | A comparison of physical therapy, manipulation and educational booklet for low back pain | 12wk           | N                                     | N                                           | N                                     | Authors concluded that physical therapy and manipulation has similar treatment effects and costs. Both treatments were only marginally better than the booklet.                 |
| Garcia et al. <sup>71</sup>   | 2013 | McKenzie: 74<br>Back School: 74                  | Non-specific | Chronic      | Back school versus McKenzie exercises in patients with chronic back pain                 | 4wk            | N                                     | Y                                           | -                                     | Authors concluded McKenzie had greater improvement in disability, but not pain compared to back school. The magnitude of effect was small meaning doubtful clinical importance. |
| Halliday et al. <sup>72</sup> | 2016 | McKenzie: 35<br>Motor Control: 35                | Non-specific | Chronic      | A randomized trial comparing McKenzie to Motor Control exercise in chronic low back pain | 8wk            | N                                     | N                                           | -                                     | Authors concluded that perceived recovery was greater in the McKenzie group, but no differences were seen in other patient reported outcomes.                                   |
| Johnson et al. <sup>73</sup>  | 2010 | Total: 53 (group numbers no reported)            | Unclear      | Chronic      | Comparison of four physiotherapy regimes for treating mechanical low back pain           | 8wk            | Y (to control only)                   | Y (to control only)                         | -                                     | Authors concluded that all regimens apart from back education only, were effective for treating long term low back pain                                                         |
| Long et al. <sup>74</sup>     | 2004 | Matched: 80<br>Opposite: 70<br>Standard Care: 80 | Non-specific | Mixed        | Does it matter which exercise for the McKenzie method                                    | 2wk            | Y (favors matched direction)          | Y (favors matched direction)                | -                                     | Authors concluded that matching treatment to directional preference rapidly improved outcomes.                                                                                  |
| Machado et al. <sup>75</sup>  | 2010 | McKenzie: 73<br>First-line Care: 73              | Non-specific | Acute        | The effectiveness of McKenzie method in acute low back pain                              | 3wk            | Y                                     | N                                           | -                                     | Authors concluded a treatment program based on the McKenzie method does not produce appreciable                                                                                 |
| Miller et al. <sup>76</sup>   | 2005 | McKenzie: 14<br>Motor Control: 15                | Non-specific | Chronic      | A comparison of McKenzie versus stabilization exercise for chronic low back pain         | 6wk            | N                                     | N                                           | -                                     | Authors concluded there were no statistical differences between groups.                                                                                                         |
| Paatelma et al. <sup>77</sup> | 2008 | McKenzie: 52<br>Manual Therapy: 45<br>Advice: 37 | Non-specific | Mixed        | Manuel therapy, McKenzie and advice for low back pain in working adults                  | 12wk           | N                                     | N                                           | -                                     | Authors concluded that manipulations and McKenzie are only marginally more effective than advice-only.                                                                          |

|                               |      |                                     |              |         |                                                                                     |     |   |   |   |                                                                                                                                  |
|-------------------------------|------|-------------------------------------|--------------|---------|-------------------------------------------------------------------------------------|-----|---|---|---|----------------------------------------------------------------------------------------------------------------------------------|
| Petersen et al. <sup>78</sup> | 2002 | McKenzie: 132<br>Strengthening: 128 | Non-specific | Mixed   | McKenzie compared to intensive strengthening for subacute and chronic low back pain | 8wk | N | N | - | Authors conclude McKenzie and dynamic strengthening are equally effective.                                                       |
| Petersen et al. <sup>62</sup> | 2011 | McKenzie: 175<br>Manipulations: 175 | Non-specific | Chronic | McKenzie compared to manipulations when used as an adjunctive therapy               | 8wk | N | N | - | Authors concluded that the results of this study support the value of classification approaches for management of low back pain. |

<sup>1</sup>Only trials that clearly stated treatment based on classification were included.

<sup>2</sup>Significant in favour of McKenzie over other treatment or control.

**Supplementary Table 10.** Machine learning/artificial intelligence search

| <b>MEDLINE</b>                                                                                                |                                                                                                                                                                                                      |             |
|---------------------------------------------------------------------------------------------------------------|------------------------------------------------------------------------------------------------------------------------------------------------------------------------------------------------------|-------------|
| <b>Search</b>                                                                                                 | <b>Query</b>                                                                                                                                                                                         | <b>Hits</b> |
| #1                                                                                                            | ((back pain[MeSH terms]) or low back pain[MeSH terms]) or ("back pain*" OR "lumb* pain" OR lumbago OR backache* OR "back ache*")                                                                     | 80928       |
| #2                                                                                                            | (Artificial Intelligence[MeSH Terms])                                                                                                                                                                | 86883       |
| #3                                                                                                            | (#1 AND #2)                                                                                                                                                                                          | 96          |
| <b>SPORTDiscus (via EBSCOHOST) (DE = dictionary term). No Thesaurus term for Artificial Intelligence)</b>     |                                                                                                                                                                                                      |             |
| <b>Search</b>                                                                                                 | <b>Query</b>                                                                                                                                                                                         | <b>Hits</b> |
| #1                                                                                                            | (DE lumbar pain) OR (DE backache) OR ("back pain*" OR "lumb* pain" OR lumbago OR backache* OR "back ache*")                                                                                          | 9623        |
| #2                                                                                                            | Artificial Intelligence OR "Computer Heuristics" OR "Expert Systems" OR "Fuzzy Logic" OR "Knowledge Bases" OR "Machine Learning" OR "Deep Learning" OR "Support Vector Machine" OR "Neural Networks" | 915         |
| #3                                                                                                            | S2 AND S3                                                                                                                                                                                            | 2           |
| <b>CINAHL (via EBSCOHOST) (MH =coding for meshterm)</b>                                                       |                                                                                                                                                                                                      |             |
| <b>Search</b>                                                                                                 | <b>Query</b>                                                                                                                                                                                         | <b>Hits</b> |
| #1                                                                                                            | ((MH "back pain") OR MH "low back pain") OR ("back pain*" OR "lumb* pain" OR lumbago OR backache* OR "back ache*")                                                                                   | 34242       |
| #2                                                                                                            | (MH "Artificial Intelligence+")                                                                                                                                                                      | 14604       |
| #3                                                                                                            | S1 AND S2                                                                                                                                                                                            | 31          |
| <b>PsycINFO (via EBSCOHOST) (DE = coding for meshterm)</b>                                                    |                                                                                                                                                                                                      |             |
| <b>Search</b>                                                                                                 | <b>Query</b>                                                                                                                                                                                         | <b>Hits</b> |
| #1                                                                                                            | (DE "Back Pain") OR ("back pain*" OR "lumb* pain" OR lumbago OR backache* OR "back ache*")                                                                                                           | 6308        |
| #2                                                                                                            | DE "Artificial Intelligence"                                                                                                                                                                         | 9521        |
| #3                                                                                                            | S1 AND S2                                                                                                                                                                                            | 2           |
| <b>EMBASE (Go to Emtree to find dictionary)</b>                                                               |                                                                                                                                                                                                      |             |
| <b>Search</b>                                                                                                 | <b>Query</b>                                                                                                                                                                                         | <b>Hits</b> |
| #1                                                                                                            | "low back pain"/exp OR "backache"/exp OR "back pain*" OR "lumb* pain" OR lumbago OR backache* OR "back ache*"                                                                                        | 119608      |
| #2                                                                                                            | 'artificial intelligence'/exp                                                                                                                                                                        | 20178       |
| #3                                                                                                            | #1 AND #2                                                                                                                                                                                            | 14          |
| <b>CENTRAL (Go to the search. Click on MESH term. Type it in and then Look UP. Then Add/Edit Search line)</b> |                                                                                                                                                                                                      |             |
| <b>Search</b>                                                                                                 | <b>Query</b>                                                                                                                                                                                         | <b>Hits</b> |

|                    |                                                                                                                                                                                    |             |
|--------------------|------------------------------------------------------------------------------------------------------------------------------------------------------------------------------------|-------------|
| #1                 | (MeSH descriptor: [back pain] explode all trees) OR (MeSH descriptor: [low back pain] explode all trees) OR (“back pain*” OR “lumb* pain” OR lumbago OR backache* OR “back ache”*) | 15247       |
| #2                 | (MeSH descriptor: [Artificial Intelligence] explode all trees)                                                                                                                     | 976         |
| #3                 | #1 AND #2                                                                                                                                                                          | 2           |
| <b>IEEE XPLORE</b> |                                                                                                                                                                                    |             |
| <b>Search</b>      | <b>Query</b>                                                                                                                                                                       | <b>Hits</b> |
| #1                 | (MeSH descriptor: [back pain] explode all trees) OR (MeSH descriptor: [low back pain] explode all trees) OR (“back pain*” OR “lumb* pain” OR lumbago OR backache* OR “back ache”*) |             |
| #2                 | (MeSH descriptor: [Artificial Intelligence] explode all trees)                                                                                                                     |             |
| #3                 | #1 AND #2                                                                                                                                                                          | 41          |

**Supplementary Table 11. STarT Back search**

| <b>MEDLINE</b>                                                                                                |                                                                                                                                  |             |
|---------------------------------------------------------------------------------------------------------------|----------------------------------------------------------------------------------------------------------------------------------|-------------|
| <b>Search</b>                                                                                                 | <b>Query</b>                                                                                                                     | <b>Hits</b> |
| #1                                                                                                            | STarT Back Screen*[Title/Abstract] OR STarT Back Tool[Title/Abstract]                                                            | 108         |
| #2                                                                                                            | ((back pain[MeSH terms]) or low back pain[MeSH terms]) or ("back pain*" OR "lumb* pain" OR lumbago OR backache* OR "back ache*") | 81272       |
| #3                                                                                                            | (#1 AND #2)                                                                                                                      | 108         |
| <b>SPORTDiscus (via EBSCOHOST) (DE = dictionary term).</b>                                                    |                                                                                                                                  |             |
| <b>Search</b>                                                                                                 | <b>Query</b>                                                                                                                     | <b>Hits</b> |
| #1                                                                                                            | (DE lumbar pain) OR (DE backache) OR (“back pain*” OR “lumb* pain” OR lumbago OR backache* OR “back ache*”)                      | 9670        |
| #2                                                                                                            | TI STarT Back Screen* OR AB STarT Back Screen* OR TI STarT Back Tool OR AB STarT Back Tool                                       | 32          |
| #3                                                                                                            | S1 AND S2                                                                                                                        | 31          |
| <b>CINAHL (via EBSCOHOST) (MH =coding for meshterm)</b>                                                       |                                                                                                                                  |             |
| <b>Search</b>                                                                                                 | <b>Query</b>                                                                                                                     | <b>Hits</b> |
| #1                                                                                                            | ((MH "back pain") OR MH "low back pain") OR ("back pain*" OR "lumb* pain" OR lumbago OR backache* OR "back ache*")               | 34219       |
| #2                                                                                                            | TI STarT Back Screen* OR AB STarT Back Screen* OR TI STarT Back Tool OR AB STarT Back Tool                                       | 96          |
| #3                                                                                                            | S1 AND S2                                                                                                                        | 90          |
| <b>PsycINFO (via EBSCOHOST) (DE = coding for meshterm)</b>                                                    |                                                                                                                                  |             |
| <b>Search</b>                                                                                                 | <b>Query</b>                                                                                                                     | <b>Hits</b> |
| #1                                                                                                            | (DE "Back Pain") OR (“back pain*” OR “lumb* pain” OR lumbago OR backache* OR “back ache*”)                                       | 6322        |
| #2                                                                                                            | TI STarT Back Screen* OR AB STarT Back Screen* OR TI STarT Back Tool OR AB STarT Back Tool                                       | 18          |
| #3                                                                                                            | S1 AND S2                                                                                                                        | 18          |
| <b>EMBASE (Go to Emtree to find dictionary)</b>                                                               |                                                                                                                                  |             |
| <b>Search</b>                                                                                                 | <b>Query</b>                                                                                                                     | <b>Hits</b> |
| #1                                                                                                            | STarT Back Screen*:ab OR STarT Back Screen*:ti OR STarT Back Tool:ab OR STarT Back Tool:ti                                       | 89          |
| #2                                                                                                            | “low back pain”/exp OR “backache”/exp OR “back pain*” OR “lumb* pain” OR lumbago OR backache* OR “back ache*”                    | 120269      |
| #3                                                                                                            | #1 AND #2                                                                                                                        | 73          |
| <b>CENTRAL (Go to the search. Click on MESH term. Type it in and then Look UP. Then Add/Edit Search line)</b> |                                                                                                                                  |             |
| <b>Search</b>                                                                                                 | <b>Query</b>                                                                                                                     | <b>Hits</b> |



|    |                                                                                                                                                                                    |       |
|----|------------------------------------------------------------------------------------------------------------------------------------------------------------------------------------|-------|
| #1 | (MeSH descriptor: [back pain] explode all trees) OR (MeSH descriptor: [low back pain] explode all trees) OR (“back pain*” OR “lumb* pain” OR lumbago OR backache* OR “back ache*”) | 15410 |
| #2 | STarT Back Screen* OR STarT Back Tool                                                                                                                                              | 1054  |
| #3 | #1 AND #2                                                                                                                                                                          | 313   |
| #4 | Excluding protocols                                                                                                                                                                | 306   |

**Supplementary Table 12.** McKenzie search

| <b>MEDLINE</b>                                                                                                |                                                                                                                                                                                    |             |
|---------------------------------------------------------------------------------------------------------------|------------------------------------------------------------------------------------------------------------------------------------------------------------------------------------|-------------|
| <b>Search</b>                                                                                                 | <b>Query</b>                                                                                                                                                                       | <b>Hits</b> |
| #1                                                                                                            | McKenzie[Title/Abstract]                                                                                                                                                           | 494         |
| #2                                                                                                            | ((back pain[MeSH terms]) or low back pain[MeSH terms]) or ("back pain*" OR "lumb* pain" OR lumbago OR backache* OR "back ache*")                                                   | 80930       |
| #3                                                                                                            | (#1 AND #2)                                                                                                                                                                        | 178         |
| <b>SPORTDiscus (via EBSCOHOST) (DE = dictionary term).</b>                                                    |                                                                                                                                                                                    |             |
| <b>Search</b>                                                                                                 | <b>Query</b>                                                                                                                                                                       | <b>Hits</b> |
| #1                                                                                                            | (DE lumbar pain) OR (DE backache) OR ("back pain*" OR "lumb* pain" OR lumbago OR backache* OR "back ache*")                                                                        | 9623        |
| #2                                                                                                            | TI mckenzie OR AB mckenzie                                                                                                                                                         | 786         |
| #3                                                                                                            | S1 AND S2                                                                                                                                                                          | 78          |
| <b>CINAHL (via EBSCOHOST) (MH =coding for meshterm)</b>                                                       |                                                                                                                                                                                    |             |
| <b>Search</b>                                                                                                 | <b>Query</b>                                                                                                                                                                       | <b>Hits</b> |
| #1                                                                                                            | (DE lumbar pain) OR (DE backache) OR ("back pain*" OR "lumb* pain" OR lumbago OR backache* OR "back ache*")                                                                        | 9623        |
| #2                                                                                                            | TI mckenzie OR AB mckenzie                                                                                                                                                         | 786         |
| #3                                                                                                            | S1 AND S2                                                                                                                                                                          | 78          |
| <b>PsycINFO (via EBSCOHOST) (DE = coding for meshterm)</b>                                                    |                                                                                                                                                                                    |             |
| <b>Search</b>                                                                                                 | <b>Query</b>                                                                                                                                                                       | <b>Hits</b> |
| #1                                                                                                            | (DE "Back Pain") OR ("back pain*" OR "lumb* pain" OR lumbago OR backache* OR "back ache*")                                                                                         | 6308        |
| #2                                                                                                            | TI mckenzie OR AB mckenzie                                                                                                                                                         | 206         |
| #3                                                                                                            | S1 AND S2                                                                                                                                                                          | 2           |
| <b>EMBASE (Go to Emtree to find dictionary)</b>                                                               |                                                                                                                                                                                    |             |
| <b>Search</b>                                                                                                 | <b>Query</b>                                                                                                                                                                       | <b>Hits</b> |
| #1                                                                                                            | "low back pain"/exp OR "backache"/exp OR "back pain*" OR "lumb* pain" OR lumbago OR backache* OR "back ache*")                                                                     | 119644      |
| #2                                                                                                            | mckenzie:ab OR mckenzie:ti                                                                                                                                                         | 620         |
| #3                                                                                                            | #1 AND #2                                                                                                                                                                          | 214         |
| <b>CENTRAL (Go to the search. Click on MESH term. Type it in and then Look UP. Then Add/Edit Search line)</b> |                                                                                                                                                                                    |             |
| <b>Search</b>                                                                                                 | <b>Query</b>                                                                                                                                                                       | <b>Hits</b> |
| #1                                                                                                            | (MeSH descriptor: [back pain] explode all trees) OR (MeSH descriptor: [low back pain] explode all trees) OR ("back pain*" OR "lumb* pain" OR lumbago OR backache* OR "back ache*") | 15247       |
| #2                                                                                                            | McKenzie                                                                                                                                                                           | 956         |
| #3                                                                                                            | #1 AND #2                                                                                                                                                                          | 130         |

|    |                   |     |
|----|-------------------|-----|
| #4 | (Limit to Trials) | 108 |
|----|-------------------|-----|

## SUPPLEMENTARY REFERENCES

- 1 Abedi, M. *et al.* Translation and validation of the Persian version of the STarT Back Screening Tool in patients with nonspecific low back pain. *Manual Therapy* **20**, 850-854 (2015).
- 2 Bier, J. D., Ostelo, R. W., Van Hooff, M. L., Koes, B. W. & Verhagen, A. P. Validity and reproducibility of the STarT Back Tool (Dutch Version) in patients with low back pain in primary care settings. *Physical Therapy* **97**, 561-570 (2017).
- 3 Beneciuk, J. M. *et al.* The STarT back screening tool and individual psychological measures: evaluation of prognostic capabilities for low back pain clinical outcomes in outpatient physical therapy settings. *Physical Therapy* **93**, 321-333 (2013).
- 4 Bruyere, O. *et al.* Validity and reliability of the French version of the STarT Back screening tool for patients with low back pain. *Spine (Phila Pa 1976)* **39**, E123-128, doi:10.1097/brs.000000000000062 (2014).
- 5 Hill, J. C. *et al.* A primary care back pain screening tool: Identifying patient subgroups for initial treatment. *Arthritis Care & Research* **59**, 632-641 (2008).
- 6 Karstens, S. *et al.* Validation of the German version of the STarT-Back Tool (STarT-G): a cohort study with patients from primary care practices. *BMC Musculoskeletal Disorders* **16**, 346 (2015).
- 7 Luan, S. *et al.* Cross-cultural adaptation, reliability, and validity of the Chinese version of the STarT Back Screening Tool in patients with low back pain. *Spine* **39**, E974-979, doi:10.1097/brs.0000000000000413 (2014).
- 8 Matsudaira, K. *et al.* Psychometric properties of the Japanese version of the STarT back tool in patients with low back pain. *PloS one* **11**, e0152019 (2016).
- 9 Piironen, S. *et al.* Transcultural adaption and psychometric properties of the STarT Back Screening Tool among Finnish low back pain patients. *European spine journal : official publication of the European Spine Society, the European Spinal Deformity Society, and the European Section of the Cervical Spine Research Society* **25**, 287-295, doi:10.1007/s00586-015-3804-6 (2016).
- 10 Yelvar, G. D. Y. *et al.* Validity and reliability of Turkish version of STarT Back Screening Tool. (2019).
- 11 Pilz, B. *et al.* The Brazilian version of STarT Back Screening Tool-translation, cross-cultural adaptation and reliability. *Brazilian Journal of Physical Therapy* **18**, 453-461 (2014).
- 12 Raimundo, A. M. M. *et al.* Portuguese translation, cross-cultural adaptation and reliability of the questionnaire "Start Back Screening Tool"(SBST). (2017).
- 13 Robinson, H. S. & Dagfinrud, H. Reliability and screening ability of the StarT Back screening tool in patients with low back pain in physiotherapy practice, a cohort study. *BMC Musculoskeletal Disorders* **18**, 232 (2017).
- 14 Aebischer, B., Hill, J. C., Hilfiker, R. & Karstens, S. German translation and cross-cultural adaptation of the STarT back screening tool. *PLoS One* **10**, e0132068 (2015).
- 15 Beneciuk, J. M., Robinson, M. E. & George, S. Z. Subgrouping for patients with low back pain: a multidimensional approach incorporating cluster analysis and the STarT Back Screening Tool. *The Journal of Pain* **16**, 19-30 (2015).
- 16 Fuhro, F. F., Fagundes, F. R., Manzoni, A. C., Costa, L. O. & Cabral, C. M. Orebro Musculoskeletal Pain Screening Questionnaire Short-Form and STarT Back Screening Tool: Correlation and Agreement Analysis. *Spine* **41**, E931-936, doi:10.1097/brs.0000000000001415 (2016).

- 17 Hill, J. C., Dunn, K. M., Main, C. J. & Hay, E. M. Subgrouping low back pain: a comparison of the STarT Back Tool with the Örebro Musculoskeletal Pain Screening Questionnaire. *European Journal of Pain* **14**, 83-89 (2010).
- 18 Pilz, B. *et al.* Construct and discriminant validity of STarT Back Screening Tool–Brazilian version. *Brazilian Journal of Physical Therapy* **21**, 69-73 (2017).
- 19 Azevedo, D. C. *et al.* Baseline characteristics did not identify people with low back pain who respond best to a Movement System Impairment-Based classification treatment. *Brazilian Journal of Physical Therapy* (2019).
- 20 Beneciuk, J. M., Fritz, J. M. & George, S. Z. The STarT Back Screening Tool for prediction of 6-month clinical outcomes: relevance of change patterns in outpatient physical therapy settings. *Journal of Orthopaedic & Sports Physical Therapy* **44**, 656-664 (2014).
- 21 Field, J. & Newell, D. Relationship between STarT Back Screening Tool and prognosis for low back pain patients receiving spinal manipulative therapy. *Chiropractic & Manual Therapies* **20**, 17 (2012).
- 22 Friedman, B. W., Conway, J., Campbell, C., Bijur, P. E. & John Gallagher, E. Pain one week after an emergency department visit for acute low back pain is associated with poor three-month outcomes. *Academic Emergency Medicine* **25**, 1138-1145 (2018).
- 23 George, S. Z. & Beneciuk, J. M. Psychological predictors of recovery from low back pain: a prospective study. *BMC Musculoskeletal Disorders* **16**, 49 (2015).
- 24 Karran, E. L. *et al.* The value of prognostic screening for patients with low back pain in secondary care. *The Journal of Pain* **18**, 673-686 (2017).
- 25 Karstens, S. *et al.* Prognostic ability of the German version of the STarT Back tool: analysis of 12-month follow-up data from a randomized controlled trial. *BMC Musculoskeletal Disorders* **20**, 94 (2019).
- 26 Katzan, I. L. *et al.* The use of STarT back screening tool to predict functional disability outcomes in patients receiving physical therapy for low back pain. *The Spine Journal* **19**, 645-654 (2019).
- 27 Kendell, M. *et al.* The predictive ability of the STarT Back Tool was limited in people with chronic low back pain: a prospective cohort study. *Journal of Physiotherapy* **64**, 107-113 (2018).
- 28 Kongsted, A., Andersen, C. H., Hansen, M. M. & Hestbaek, L. Prediction of outcome in patients with low back pain—a prospective cohort study comparing clinicians' predictions with those of the Start back tool. *Manual Therapy* **21**, 120-127 (2016).
- 29 Matsudaira, K. *et al.* The Japanese version of the STarT Back Tool predicts 6-month clinical outcomes of low back pain. *Journal of Orthopaedic Science* **22**, 224-229 (2017).
- 30 Medeiros, F. C., Costa, L. O. P., Added, M. A. N., Salomão, E. C. & Costa, L. d. C. M. Longitudinal monitoring of patients with chronic low back pain during physical therapy treatment using the STarT back screening tool. *Journal of Orthopaedic & Sports Physical Therapy* **47**, 314-323 (2017).
- 31 Medeiros, F. C., Costa, L. O. P., Oliveira, I. S., Oshima, R. K. & Costa, L. C. M. The use of STarT BACK Screening Tool in emergency departments for patients with acute low back pain: a prospective inception cohort study. *European Spine Journal* **27**, 2823-2830 (2018).
- 32 Mehling, W., Avins, A., Acree, M., Carey, T. & Hecht, F. Can a back pain screening tool help classify patients with acute pain into risk levels for chronic pain? *European Journal of Pain* **19**, 439-446 (2015).

- 33 Morso, L. *et al.* The predictive and external validity of the STarT Back Tool in Danish primary care. *European spine journal : official publication of the European Spine Society, the European Spinal Deformity Society, and the European Section of the Cervical Spine Research Society* **22**, 1859-1867, doi:10.1007/s00586-013-2690-z (2013).
- 34 Morsø, L., Kent, P., Manniche, C. & Albert, H. B. The predictive ability of the STarT Back Screening Tool in a Danish secondary care setting. *European Spine Journal* **23**, 120-128 (2014).
- 35 Nielsen, A. M., Hestbaek, L., Vach, W., Kent, P. & Kongsted, A. Latent class analysis derived subgroups of low back pain patients—do they have prognostic capacity? *BMC Musculoskeletal Disorders* **18**, 345 (2017).
- 36 Pagé, I., Abboud, J., Laurencelle, L. & Descarreaux, M. Chronic low back pain clinical outcomes present higher associations with the STarT Back Screening Tool than with physiologic measures: a 12-month cohort study. *BMC Musculoskeletal Disorders* **16**, 201 (2015).
- 37 Riis, A., Rathleff, M. S., Jensen, C. E. & Jensen, M. B. Predictive ability of the start back tool: an ancillary analysis of a low back pain trial from Danish general practice. *BMC Musculoskeletal Disorders* **18**, 360 (2017).
- 38 Storm, L., Rousing, R., Andersen, M. O. & Carreon, L. Y. Usefulness of the STarT Back Screening Tool to predict pain problems after lumbar spine surgery. *Danish Medical Journal* **65** (2018).
- 39 Suri, P., Delaney, K., Rundell, S. D. & Cherkin, D. C. Predictive validity of the STarT Back tool for risk of persistent disabling back pain in a US primary care setting. *Archives of Physical Medicine and Rehabilitation* **99**, 1533-1539 (2018).
- 40 Tan, C. I. C. *et al.* Predicting outcomes of acute low back pain patients in emergency department: a prospective observational cohort study. *Medicine* **97** (2018).
- 41 Toh, I., Chong, H.-C., Suet-Ching Liaw, J. & Pua, Y.-H. Evaluation of the STarT Back screening tool for prediction of low back pain intensity in an outpatient physical therapy setting. *Journal of Orthopaedic & Sports Physical Therapy* **47**, 261-267 (2017).
- 42 Von Korff, M. *et al.* Comparison of back pain prognostic risk stratification item sets. *The Journal of Pain* **15**, 81-89 (2014).
- 43 Cherkin, D. *et al.* Effect of low back pain risk-stratification strategy on patient outcomes and care processes: the match randomized trial in primary care. *Journal of General Internal Medicine* **33**, 1324-1336 (2018).
- 44 Hill, J. C. *et al.* Comparison of stratified primary care management for low back pain with current best practice (STarT Back): A randomised controlled trial. *The Lancet* **378**, 1560-1571 (2011).
- 45 Murphy, S. E., Blake, C., Power, C. K. & Fullen, B. M. Comparison of a Stratified Group Intervention (STarT Back) With Usual Group Care in Patients With Low Back Pain: A Nonrandomized Controlled Trial. *Spine (Phila Pa 1976)* **41**, 645-652, doi:10.1097/brs.0000000000001305 (2016).
- 46 Foster, N. E. *et al.* Effect of stratified care for low back pain in family practice (IMPACT Back): a prospective population-based sequential comparison. *The Annals of Family Medicine* **12**, 102-111 (2014).
- 47 Clare, H. A., Adams, R. & Maher, C. G. Reliability of detection of lumbar lateral shift. *Journal of Manipulative and Physiological Therapeutics* **26**, 476-480 (2003).
- 48 Clare, H. A., Adams, R. & Maher, C. G. Reliability of McKenzie classification of patients with cervical or lumbar pain. *Journal of Manipulative and Physiological Therapeutics* **28**, 122-127 (2005).

- 49 Donahue, M. S., Riddle, D. L. & Sullivan, M. S. Intertester reliability of a modified version of McKenzie's lateral shift assessments obtained on patients with low back pain. *Physical Therapy* **76**, 706-716 (1996).
- 50 Flavell, C. A., Gordon, S. & Marshman, L. Classification characteristics of a chronic low back pain population using a combined McKenzie and patho-anatomical assessment. *Manual Therapy* **26**, 201-207 (2016).
- 51 Fritz, J. M., Delitto, A., Vignovic, M. & Busse, R. G. Interrater reliability of judgments of the centralization phenomenon and status change during movement testing in patients with low back pain. *Archives of Physical Medicine and Rehabilitation* **81**, 57-61 (2000).
- 52 Kilby, J., Stigant, M. & Roberts, A. The reliability of back pain assessment by physiotherapists, using a 'McKenzie algorithm'. *Physiotherapy* **76**, 579-583 (1990).
- 53 Kilpikoski, S. *et al.* Interexaminer reliability of low back pain assessment using the McKenzie method. *Spine* **27**, E207-E214 (2002).
- 54 Razmjou, H., Kramer, J. F. & Yamada, R. Intertester reliability of the McKenzie evaluation in assessing patients with mechanical low back pain. *Journal of Orthopaedic & Sports Physical Therapy* **30**, 368-389 (2000).
- 55 Riddle, D. L. & Rothstein, J. M. Intertester reliability of McKenzie's classifications of the syndrome types present in patients with low back pain. *Spine* **18**, 1333-1344 (1993).
- 56 Seymour, R., Walsh, T., Blankenberg, C., Pickens, A. & Rush, H. Reliability of detecting a relevant lateral shift in patients with lumbar derangement: a pilot study. *Journal of Manual & Manipulative Therapy* **10**, 129-135 (2002).
- 57 Werneke, M. W. *et al.* McKenzie lumbar classification: inter-rater agreement by physical therapists with different levels of formal McKenzie postgraduate training. *Spine* **39**, E182-E190 (2014).
- 58 Edmond, S. L. *et al.* Directional preference, cognitive behavioural interventions, and outcomes among patients with chronic low back pain. *Physiotherapy Research International*, e1773 (2019).
- 59 Garcia, A. N., Costa, L. d. C. M., Hancock, M. & Costa, L. O. P. Identifying patients with chronic low back pain who respond best to mechanical diagnosis and therapy: secondary analysis of a randomized controlled trial. *Physical Therapy* **96**, 623-630 (2016).
- 60 Karas, R., McIntosh, G., Hall, H., Wilson, L. & Melles, T. The relationship between nonorganic signs and centralization of symptoms in the prediction of return to work for patients with low back pain. *Physical Therapy* **77**, 354-360 (1997).
- 61 Long, A., May, S. & Fung, T. The comparative prognostic value of directional preference and centralization: a useful tool for front-line clinicians? *Journal of Manual & Manipulative Therapy* **16**, 248-254 (2008).
- 62 Petersen, T. *et al.* The McKenzie method compared with manipulation when used adjunctive to information and advice in low back pain patients presenting with centralization or peripheralization: a randomized controlled trial. *Spine* **36**, 1999-2010 (2011).
- 63 Petersen, T., Christensen, R. & Juhl, C. Predicting a clinically important outcome in patients with low back pain following McKenzie therapy or spinal manipulation: a stratified analysis in a randomized controlled trial. *BMC Musculoskeletal Disorders* **16**, 74 (2015).
- 64 Sufka, A. *et al.* Centralization of low back pain and perceived functional outcome. *Journal of Orthopaedic & Sports Physical Therapy* **27**, 205-212 (1998).

- 65 Werneke, M. & Hart, D. L. Centralization phenomenon as a prognostic factor for chronic low back pain and disability. *Spine* **26**, 758-764 (2001).
- 66 Werneke, M. W. *et al.* Effect of adding McKenzie syndrome, centralization, directional preference, and psychosocial classification variables to a risk-adjusted model predicting functional status outcomes for patients with lumbar impairments. *Journal of Orthopaedic & Sports Physical Therapy* **46**, 726-741 (2016).
- 67 Werneke, M. W. *et al.* Directional preference and functional outcomes among subjects classified at high psychosocial risk using STarT. *Physiotherapy Research International* **23**, e1711 (2018).
- 68 Yarnznbowicz, R., Tao, M., Owens, A., Wlodarski, M. & Dolutan, J. Pain pattern classification and directional preference are associated with clinical outcomes for patients with low back pain. *Journal of Manual & Manipulative Therapy* **26**, 18-24 (2018).
- 69 Bid, D. D. A study on central sensitization in chronic non specific low back pain. *Indian Journal of Physiotherapy & Occupational Therapy*, 160 (2018).
- 70 Cherkin, D. C., Deyo, R. A., Battié, M., Street, J. & Barlow, W. A comparison of physical therapy, chiropractic manipulation, and provision of an educational booklet for the treatment of patients with low back pain. *New England Journal of Medicine* **339**, 1021-1029 (1998).
- 71 Garcia, A. N. *et al.* Effectiveness of back school versus McKenzie exercises in patients with chronic nonspecific low back pain: a randomized controlled trial. *Physical Therapy* **93**, 729-747 (2013).
- 72 Halliday, M. H. *et al.* A randomized controlled trial comparing the McKenzie method to motor control exercises in people with chronic low back pain and a directional preference. *Journal of Orthopaedic & Sports Physical Therapy* **46**, 514-522 (2016).
- 73 Johnson, O. E., Adegoke, B. O. & Ogunlade, S. O. Comparison of four physiotherapy regimens in the treatment of long-term mechanical low back pain. *Journal of the Japanese Physical Therapy Association* **13**, 9-16 (2010).
- 74 Long, A., Donelson, R. & Fung, T. Does it matter which exercise? A randomized control trial of exercise for low back pain. *Spine* **29**, 2593-2602 (2004).
- 75 Machado, L. A., Maher, C. G., Herbert, R. D., Clare, H. & McAuley, J. H. The effectiveness of the McKenzie method in addition to first-line care for acute low back pain: a randomized controlled trial. *BMC Medicine* **8**, 10 (2010).
- 76 Miller, E. R., Schenk, R. J., Karnes, J. L. & Rousselle, J. G. A comparison of the McKenzie approach to a specific spine stabilization program for chronic low back pain. *Journal of Manual & Manipulative Therapy* **13**, 103-112 (2005).
- 77 Paatelma, M. *et al.* Orthopaedic manual therapy, McKenzie method or advice only for low back pain in working adults: a randomized controlled trial with one year follow-up. *Journal of Rehabilitation Medicine* **40**, 858-863 (2008).
- 78 Petersen, T., Kryger, P., Ekdahl, C., Olsen, S. & Jacobsen, S. The effect of McKenzie therapy as compared with that of intensive strengthening training for the treatment of patients with subacute or chronic low back pain: a randomized controlled trial. *Spine* **27**, 1702-1709 (2002).
